# Supplementary material for: Identifying Genetic Variations in emm89 Streptococcus pyogenes Associated with Severe Invasive Infections
Source: bioRxiv preprint, doi:10.1101/2024.07.02.601674, version 2 (2025-04-16)
Supplement: Supplementary Tables [file 601674_file02.xlsx]

## Sheet: Table S1
Table S1. Definitions of severe invasive hemolytic streptococcal infections by the Ministry of Health, Labour and Welfare (MHLW) in Japan and STSS by the Centers for Disease Control and Prevention (CDC).
MHLW definition of severe invasive hemolytic streptococcal Infections
Satisfying criteria A(a), A(b), and B described below:
A. Clinical symptoms
(a) Symptoms of shock
(b) Symptoms characterized by two or more of the following:
	liver impairment, renal impairment, acute respiratory distress syndrome, disseminated intravascular coagulation syndrome (DIC), soft tissue inflammation (including necrotizing fasciitis), generalized erythematous rash, and symptoms in the central nervous system such as convulsion and exanimation
B. Pathogen detection
	Isolation or detection of β-hemolytic streptococci from a normally sterile site (including blood, cerebrospinal fluid, pleural fluid, and ascites fluid), biopsy tissue, surgical wound, or necrotic soft tissue
Streptococcal toxic shock syndrome (STSS) (Streptococcus pyogenes) 2010 case definition by CDC
Clinical criteria
An illness with the following clinical manifestations:
Hypotension
Multi-organ involvement characterized by two or more of the following:
	liver involvement, renal impairment, acute respiratory distress syndrome, coagulopathy, soft-tissue necrosis, and generalized erythematous muscular rash
Laboratory criteria for diagnosis
Isolation of group A Streptococcus

## Sheet: Table S2
Table S2. Whole-genome sequences analyzed in this study.
Invasive	Non-invasive	Total		Reference
98	24	122		Beres et al. 2017 [25]
165	0	165		Chochua et al. 2017 [26]
22	46	68		Davies et al. 2019 [27]
89	72	161		Hirose et al. 2020 [14]
46	104	150		This study
420	246	666		Total

## Sheet: Table S3
Table S3. Clinical isolates collected in this study.
ID		Sample names	Nicknames	Biosample accession	DRA accession	Cities	Country	Year		Diagnoses	Invasiveness		Sites	T		emm		MLST
1		2016-A-9	KB01	SAMD00638238	DRR511668	Kobe	Japan	2016		pharyngitis	non-invasive		pharynx	B3264		89		101
2		2017-A-11	KB02	SAMD00638239	DRR511669	Kobe	Japan	2017		pharyngitis	non-invasive		pharynx	B3264		89		101
3		2018-A-13	KB03	SAMD00638240	DRR511670	Kobe	Japan	2018		pharyngitis	non-invasive		pharynx	B3264		89		101
4		2018-A-15	KB04	SAMD00638241	DRR511671	Kobe	Japan	2018		pharyngitis	non-invasive		pharynx	B3264		89		646
5		2018-A-16	KB05	SAMD00638242	DRR511672	Kobe	Japan	2018		pharyngitis	non-invasive		pharynx	B3264		89		101
6		2019-A-5	KB06	SAMD00638243	DRR511673	Kobe	Japan	2019		pharyngitis	non-invasive		pharynx	B3264		89		646
7		2019-A-9	KB07	SAMD00638244	DRR511674	Kobe	Japan	2019		pharyngitis	non-invasive		pharynx	B3264		89		101
8		2019-A-10	KB08	SAMD00638245	DRR511675	Kobe	Japan	2019		pharyngitis	non-invasive		pharynx	B3264		89		646
9		2019-A-18	KB09	SAMD00638246	DRR511676	Kobe	Japan	2019		pharyngitis	non-invasive		pharynx	B3264		89		101
10		2019-A-19	KB10	SAMD00638247	DRR511677	Kobe	Japan	2019		pharyngitis	non-invasive		pharynx	B3264		89		101
11		2019-A-26	KB11	SAMD00638248	DRR511678	Kobe	Japan	2019		pharyngitis	non-invasive		pharynx	B3264		89		101
12		ST2019-9	KB12	SAMD00638249	DRR511679	Kobe	Japan	2019		severe invasive infections	severe invasive		NA	B3264		89		101
13		ST2020-1	KB13	SAMD00638250	DRR511680	Kobe	Japan	2020		severe invasive infections	severe invasive		NA	B3264		89		101
14		StrR01-03	YG40	SAMD00638251	DRR511681	Yamaguchi	Japan	2019		pharyngitis	non-invasive		pharynx	B3264		89		101
15		StrR02-03	YG41	SAMD00638252	DRR511682	Yamaguchi	Japan	2020		pharyngitis	non-invasive		pharynx	B3264		89		101
16		Str19003	YG42	SAMD00638253	DRR511683	Yamaguchi	Japan	2019		asymptomatic	non-invasive		NA	B3264		89		101
17		Str19004	YG43	SAMD00638254	DRR511684	Yamaguchi	Japan	2019		asymptomatic	non-invasive		NA	B3264		89		101
18		Str19006	YG44	SAMD00638255	DRR511685	Yamaguchi	Japan	2019		asymptomatic	non-invasive		NA	B3264		89		101
19		Str20003	YG45	SAMD00638256	DRR511686	Yamaguchi	Japan	2020		asymptomatic	non-invasive		NA	untypable		89		101
20		Str20009	YG46	SAMD00638257	DRR511687	Yamaguchi	Japan	2020		asymptomatic	non-invasive		NA	untypable		89		101
21		strpt19-090	OS50	SAMD00638258	DRR511688	Osaka	Japan	2019		pharyngitis	non-invasive		pharynx	B3264		89		101
22		strpt19-134	OS51	SAMD00638259	DRR511689	Osaka	Japan	2019		severe invasive infections	severe invasive		NA	B3264		89		646
23		strpt19-204	OS52	SAMD00638260	DRR511690	Osaka	Japan	2019		pharyngitis	non-invasive		pharynx	B3264		89		646
24		strpt19-205	OS53	SAMD00638261	DRR511691	Kyoto	Japan	2019		severe invasive infections	severe invasive		NA	B3264		89		101
25		strpt19-212	OS54	SAMD00638262	DRR511692	Osaka	Japan	2019		severe invasive infections	severe invasive		NA	B3264		89		101
26		strpt19-236	OS55	SAMD00638263	DRR511693	Amagasaki	Japan	2019		severe invasive infections	severe invasive		NA	B3264		89		101
27		strpt19-279	OS56	SAMD00638264	DRR511694	Osaka	Japan	2019		severe invasive infections	severe invasive		NA	B3264		89		646
28		strpt19-288	OS57	SAMD00638265	DRR511695	Osaka	Japan	2019		severe invasive infections	severe invasive		NA	B3264		89		101
29		strpt19-294	OS58	SAMD00638266	DRR511696	Osaka	Japan	2019		severe invasive infections	severe invasive		NA	B3264		89		101
30		strpt20-028	OS59	SAMD00638267	DRR511697	Osaka	Japan	2020		severe invasive infections	severe invasive		NA	B3264		89		101
31		strpt20-059	OS60	SAMD00638268	DRR511698	Osaka	Japan	2020		pharyngitis	non-invasive		pharynx	B3264		89		1450
32		strpt20-061	OS61	SAMD00638269	DRR511699	Osaka	Japan	2020		severe invasive infections	severe invasive		NA	B3264		89		1451
33		strpt20-159	OS62	SAMD00638270	DRR511700	Amagasaki	Japan	2020		severe invasive infections	severe invasive		NA	B3264		89		101
34		strpt20-166	OS63	SAMD00638271	DRR511701	Kyoto	Japan	2020		severe invasive infections	severe invasive		NA	B3264		89		646
35		strpt21-024	OS64	SAMD00638272	DRR511702	Osaka	Japan	2021		pharyngitis	non-invasive		pharynx	B3264		89		101
36		F7401	NA	SAMD00638273	DRR511703	Fukushima	Japan	2016		pharyngitis	non-invasive		pharynx	28		28.1		52
37		F7412	NA	SAMD00638274	DRR511704	Fukushima	Japan	2016		pharyngitis	non-invasive		pharynx	4		4		38
38		F7419	NA	SAMD00638275	DRR511705	Fukushima	Japan	2016		pharyngitis	non-invasive		pharynx	4		4		39
39		F7431	FS14	SAMD00638276	DRR511706	Fukushima	Japan	2016		pharyngitis	non-invasive		pharynx	B3264		89		101
40		F7432	NA	SAMD00638277	DRR511707	Fukushima	Japan	2016		pharyngitis	non-invasive		pharynx	4		4		38
41		F7448	NA	SAMD00638278	DRR511708	Fukushima	Japan	2016		pharyngitis	non-invasive		pharynx	4		4		38
42		F7468	FS15	SAMD00638279	DRR511709	Fukushima	Japan	2016		pharyngitis	non-invasive		pharynx	B3264		89		646
43		F7469	NA	SAMD00638280	DRR511710	Fukushima	Japan	2016		pharyngitis	non-invasive		pharynx	12		12		36
44		F7477	NA	SAMD00638281	DRR511711	Fukushima	Japan	2016		pharyngitis	non-invasive		pharynx	3		3.95		15
45		F7478	NA	SAMD00638282	DRR511712	Fukushima	Japan	2016		pharyngitis	non-invasive		pharynx	12		12.7		36
46		F7515	NA	SAMD00638283	DRR511713	Fukushima	Japan	2016		pharyngitis	non-invasive		pharynx	12		12		36
47		F7516	NA	SAMD00638284	DRR511714	Fukushima	Japan	2016		pharyngitis	non-invasive		pharynx	4		4		39
48		F7517	NA	SAMD00638285	DRR511715	Fukushima	Japan	2016		pharyngitis	non-invasive		pharynx	12		12		36
49		F7527	NA	SAMD00638286	DRR511716	Fukushima	Japan	2016		pharyngitis	non-invasive		pharynx	3		3.95		15
50		F7528	FS16	SAMD00638287	DRR511717	Fukushima	Japan	2016		pharyngitis	non-invasive		pharynx	B3264		89		101
51		F7529	NA	SAMD00638288	DRR511718	Fukushima	Japan	2016		pharyngitis	non-invasive		pharynx	12		12.7		36
52		F7544	NA	SAMD00638289	DRR511719	Fukushima	Japan	2017		pharyngitis	non-invasive		pharynx	12		12		36
53		F7546	FS17	SAMD00638290	DRR511720	Fukushima	Japan	2017		pharyngitis	non-invasive		pharynx	B3264		89		101
54		F7567	FS18	SAMD00638291	DRR511721	Fukushima	Japan	2017		pharyngitis	non-invasive		pharynx	B3264		89		101
55		F7587	NA	SAMD00638292	DRR511722	Fukushima	Japan	2017		pharyngitis	non-invasive		pharynx	12		12		36
56		F7600	NA	SAMD00638293	DRR511723	Fukushima	Japan	2017		pharyngitis	non-invasive		pharynx	12		12		36
57		F7601	NA	SAMD00638294	DRR511724	Fukushima	Japan	2017		pharyngitis	non-invasive		pharynx	12		12.7		36
58		F7637	NA	SAMD00638295	DRR511725	Fukushima	Japan	2017		pharyngitis	non-invasive		pharynx	4		4		39
59		F7638	NA	SAMD00638296	DRR511726	Fukushima	Japan	2017		pharyngitis	non-invasive		pharynx	12		12		36
60		F7700	FS19	SAMD00638297	DRR511727	Fukushima	Japan	2017		pharyngitis	non-invasive		pharynx	B3264		89.24		101
61		F7730	NA	SAMD00638298	DRR511728	Fukushima	Japan	2018		pharyngitis	non-invasive		pharynx	4		4		38
62		F7733	NA	SAMD00638299	DRR511729	Fukushima	Japan	2018		pharyngitis	non-invasive		pharynx	3		3.95		15
63		F7734	FS20	SAMD00638300	DRR511730	Fukushima	Japan	2018		pharyngitis	non-invasive		pharynx	B3264		89		646
64		F7820	FS21	SAMD00638301	DRR511731	Fukushima	Japan	2018		tonsillitis	non-invasive		tonsilla	B3264		89		646
65		F7821	FS22	SAMD00638302	DRR511732	Fukushima	Japan	2018		tonsillitis	non-invasive		tonsilla	B3264		89		646
66		F7822	FS23	SAMD00638303	DRR511733	Fukushima	Japan	2018		tonsillitis	non-invasive		tonsilla	B3264		89		646
67		F7886	NA	SAMD00638304	DRR511734	Fukushima	Japan	2018		pharyngitis	non-invasive		pharynx	12		12		36
68		F7920	NA	SAMD00638305	DRR511735	Fukushima	Japan	2018		pharyngitis	non-invasive		pharynx	28		48.1		161
69		F7921	FS24	SAMD00638306	DRR511736	Fukushima	Japan	2018		pharyngitis	non-invasive		pharynx	B3264		89		646
70		F7923	FS25	SAMD00638307	DRR511737	Fukushima	Japan	2018		pharyngitis	non-invasive		pharynx	B3264		89		101
71		F7924	NA	SAMD00638308	DRR511738	Fukushima	Japan	2018		pharyngitis	non-invasive		pharynx	12		12		36
72		F7936	NA	SAMD00638309	DRR511739	Fukushima	Japan	2018		pharyngitis	non-invasive		pharynx	12		12		36
73		F7952	FS26	SAMD00638310	DRR511740	Fukushima	Japan	2018		pharyngitis	non-invasive		pharynx	untypable		89		1452
74		F7953	NA	SAMD00638311	DRR511741	Fukushima	Japan	2018		pharyngitis	non-invasive		pharynx	12		12		36
75		F7955	NA	SAMD00638312	DRR511742	Fukushima	Japan	2018		pharyngitis	non-invasive		pharynx	4		4		38
76		F7956	NA	SAMD00638313	DRR511743	Fukushima	Japan	2018		pharyngitis	non-invasive		pharynx	11		11.18		403
77		F7995	NA	SAMD00638314	DRR511744	Fukushima	Japan	2019		pharyngitis	non-invasive		pharynx	untypable		81		624
78		F8019	NA	SAMD00638315	DRR511745	Fukushima	Japan	2019		pharyngitis	non-invasive		pharynx	12		12		36
79		F8035	NA	SAMD00638316	DRR511746	Fukushima	Japan	2019		pharyngitis	non-invasive		pharynx	12		12.7		36
80		F8038	NA	SAMD00638317	DRR511747	Fukushima	Japan	2019		pharyngitis	non-invasive		pharynx	3		3.95		15
81		F8041	FS27	SAMD00638318	DRR511748	Fukushima	Japan	2019		pharyngitis	non-invasive		pharynx	B3264		89		101
82		F8042	FS28	SAMD00638319	DRR511749	Fukushima	Japan	2019		pharyngitis	non-invasive		pharynx	B3264		89		1452
83		F8056	FS29	SAMD00638320	DRR511750	Fukushima	Japan	2019		pharyngitis	non-invasive		pharynx	B3264		89		1452
84		F8090	FS30	SAMD00638321	DRR511751	Fukushima	Japan	2019		pharyngitis	non-invasive		pharynx	B3264		89		101
85		F8118	FS31	SAMD00638322	DRR511752	Fukushima	Japan	2019		pharyngitis	non-invasive		pharynx	untypable		89		101
86		F8123	NA	SAMD00638323	DRR511753	Fukushima	Japan	2019		pharyngitis	non-invasive		pharynx	4		4		untypable
87		F8152	NA	SAMD00638324	DRR511754	Fukushima	Japan	2019		pharyngitis	non-invasive		pharynx	4		4		38
88		F8153	NA	SAMD00638325	DRR511755	Fukushima	Japan	2019		pharyngitis	non-invasive		pharynx	4		4		1455
89		F8154	NA	SAMD00638326	DRR511756	Fukushima	Japan	2019		pharyngitis	non-invasive		pharynx	4		4		38
90		F8155	NA	SAMD00638327	DRR511757	Fukushima	Japan	2019		pharyngitis	non-invasive		pharynx	11		11.1		403
91		F8170	NA	SAMD00638328	DRR511758	Fukushima	Japan	2019		pharyngitis	non-invasive		pharynx	3		3.95		15
92		F8189	NA	SAMD00638329	DRR511759	Fukushima	Japan	2019		pharyngitis	non-invasive		pharynx	3		3.95		15
93		F8190	NA	SAMD00638330	DRR511760	Fukushima	Japan	2019		pharyngitis	non-invasive		pharynx	4		4		38
94		F8191	NA	SAMD00638331	DRR511761	Fukushima	Japan	2019		pharyngitis	non-invasive		pharynx	12		12		36
95		F8192	NA	SAMD00638332	DRR511762	Fukushima	Japan	2019		pharyngitis	non-invasive		pharynx	3		3.95		15
96		F8193	NA	SAMD00638333	DRR511763	Fukushima	Japan	2020		pharyngitis	non-invasive		pharynx	12		12		36
97		F8215	NA	SAMD00638334	DRR511764	Fukushima	Japan	2020		pharyngitis	non-invasive		pharynx	4		4		38
98		F8216	NA	SAMD00638335	DRR511765	Fukushima	Japan	2020		pharyngitis	non-invasive		pharynx	4		4		38
99		F8217	NA	SAMD00638336	DRR511766	Fukushima	Japan	2020		pharyngitis	non-invasive		pharynx	11		11.1		403
100		F8223	NA	SAMD00638337	DRR511767	Fukushima	Japan	2020		pharyngitis	non-invasive		pharynx	4		4		38
101		F8225	NA	SAMD00638338	DRR511768	Fukushima	Japan	2020		pharyngitis	non-invasive		pharynx	4		4		38
102		F8227	NA	SAMD00638339	DRR511769	Fukushima	Japan	2020		pharyngitis	non-invasive		pharynx	11		11.1		403
103		F8239	NA	SAMD00638340	DRR511770	Fukushima	Japan	2020		pharyngitis	non-invasive		pharynx	12		12		36
104		F8245	FS32	SAMD00638341	DRR511771	Fukushima	Japan	2020		pharyngitis	non-invasive		pharynx	B3264		89		101
105		F8264	NA	SAMD00638342	DRR511772	Fukushima	Japan	2020		pharyngitis	non-invasive		pharynx	4		4		38
106		F8295	NA	SAMD00638343	DRR511773	Fukushima	Japan	2020		pharyngitis	non-invasive		oral cavity	4		4		38
107		F8308	NA	SAMD00638344	DRR511774	Fukushima	Japan	2020		pharyngitis	non-invasive		pharynx	4		4		38
108		F8309	FS33	SAMD00638345	DRR511775	Fukushima	Japan	2020		pharyngitis	non-invasive		pharynx	untypable		89		101
109		F8323	NA	SAMD00638346	DRR511776	Fukushima	Japan	2020		pharyngitis	non-invasive		pharynx	4		4		38
110		F8324	NA	SAMD00638347	DRR511777	Fukushima	Japan	2020		pharyngitis	non-invasive		pharynx	4		4		38
111		F8333	NA	SAMD00638348	DRR511778	Fukushima	Japan	2020		pharyngitis	non-invasive		pharynx	4		4		38
112		F8334	FS34	SAMD00638349	DRR511779	Fukushima	Japan	2020		pharyngitis	non-invasive		oral cavity	B3264		89		646
113		F8335	NA	SAMD00638350	DRR511780	Fukushima	Japan	2020		pharyngitis	non-invasive		oral cavity	4		4		38
114		F8343	FS35	SAMD00638351	DRR511781	Fukushima	Japan	2020		pharyngitis	non-invasive		pharynx	B3264		89		101
115		F8373	FS36	SAMD00638352	DRR511782	Fukushima	Japan	2021		pharyngitis	non-invasive		oral cavity	untypable		89		646
116		F7799	FS37	SAMD00638353	DRR511783	Fukushima	Japan	2018		bacteremia	severe invasive		blood	B3264		89		646
117		F8219	FS38	SAMD00638354	DRR511784	Fukushima	Japan	2020		bacteremia	severe invasive		blood	B3264		89		646
118		F7796	FS39	SAMD00638355	DRR511785	Sapporo	Japan	2018		bacteremia	severe invasive		blood	B3264		89		101
119		F7883	FS40	SAMD00638356	DRR511786	Sapporo	Japan	2018		bacteremia	severe invasive		blood	B3264		89		101
120		F8093	FS41	SAMD00638357	DRR511787	Sapporo	Japan	2019		bacteremia	severe invasive		blood	untypable		89		101
121		F8104	FS42	SAMD00638358	DRR511788	Sapporo	Japan	2019		severe invasive infections	severe invasive		pleural fluid	untypable		89		101
122		F8105	FS43	SAMD00638359	DRR511789	Sapporo	Japan	2019		necrotizing fasciitis	severe invasive		necrotized soft tissue	untypable		89		101
123		F8233	FS44	SAMD00638360	DRR511790	Sapporo	Japan	2020		severe invasive infections	severe invasive		tissue	untypable		89		1285
124		F8362	FS45	SAMD00638361	DRR511791	Sapporo	Japan	2020		bacteremia	severe invasive		blood	untypable		89		101
125		F8243	FS46	SAMD00638362	DRR511792	Niigata	Japan	2020		bacteremia	severe invasive		blood	B3264		89		101
126		SPE2737	TK43	SAMD00638363	DRR511793	Tokyo	Japan	2017		severe invasive infections	severe invasive		NA	B3264		89		101
127		SPE2757	TK44	SAMD00638364	DRR511794	Tokyo	Japan	2017		severe invasive infections	severe invasive		NA	B3264		89		646
128		SPE2765	TK45	SAMD00638365	DRR511795	Tokyo	Japan	2017		severe invasive infections	severe invasive		NA	B3264		89		101
129		SPE2773	TK46	SAMD00638366	DRR511796	Tokyo	Japan	2017		severe invasive infections	severe invasive		NA	B3264		89		646
130		SPE2769	TK47	SAMD00638367	DRR511797	Tokyo	Japan	2018		severe invasive infections	severe invasive		NA	B3264		89		1456
131		SPE2785	TK48	SAMD00638368	DRR511798	Tokyo	Japan	2018		severe invasive infections	severe invasive		NA	B3264		89		101
132		SPE2814	TK49	SAMD00638369	DRR511799	Tokyo	Japan	2018		severe invasive infections	severe invasive		NA	B3264		89		101
133		SPE2818	TK50	SAMD00638370	DRR511800	Tokyo	Japan	2018		severe invasive infections	severe invasive		NA	B3264		89		101
134		SPE2821	TK51	SAMD00638371	DRR511801	Tokyo	Japan	2018		severe invasive infections	severe invasive		NA	B3264		89		101
135		SPE2842	TK52	SAMD00638372	DRR511802	Tokyo	Japan	2018		severe invasive infections	severe invasive		NA	B3264		89		646
136		SPE2850	TK53	SAMD00638373	DRR511803	Tokyo	Japan	2018		severe invasive infections	severe invasive		NA	B3264		89		101
137		SPE2861	TK54	SAMD00638374	DRR511804	Tokyo	Japan	2019		severe invasive infections	severe invasive		NA	B3264		89		101
138		SPE2874	TK55	SAMD00638375	DRR511805	Tokyo	Japan	2019		severe invasive infections	severe invasive		NA	B3264		89		101
139		SPE2900	TK56	SAMD00638376	DRR511806	Tokyo	Japan	2019		severe invasive infections	severe invasive		NA	B3264		89		101
140		SPE2904	TK57	SAMD00638377	DRR511807	Tokyo	Japan	2019		severe invasive infections	severe invasive		NA	B3264		89		101
141		SPE2916	TK58	SAMD00638378	DRR511808	Tokyo	Japan	2019		severe invasive infections	severe invasive		NA	B3264		89.28		101
142		SPE2917	TK59	SAMD00638379	DRR511809	Tokyo	Japan	2019		severe invasive infections	severe invasive		NA	B3264		89		646
143		SPE2933	TK60	SAMD00638380	DRR511810	Tokyo	Japan	2019		severe invasive infections	severe invasive		NA	B3264		89		101
144		SPE2970	TK61	SAMD00638381	DRR511811	Tokyo	Japan	2019		severe invasive infections	severe invasive		NA	B3264		89		101
145		SPE2971	TK62	SAMD00638382	DRR511812	Tokyo	Japan	2019		severe invasive infections	severe invasive		NA	B3264		89		101
146		SPE2974	TK63	SAMD00638383	DRR511813	Tokyo	Japan	2020		severe invasive infections	severe invasive		NA	B3264		89		101
147		SPE2979	TK64	SAMD00638384	DRR511814	Tokyo	Japan	2020		severe invasive infections	severe invasive		NA	B3264		89		101
148		SPE3058	TK65	SAMD00638385	DRR511815	Tokyo	Japan	2020		severe invasive infections	severe invasive		NA	B3264		89		101
149		6834	TK66	SAMD00638386	DRR511816	Tokyo	Japan	2017		non-invasive infections	non-invasive		NA	B3264		89		101
150		6913	TK67	SAMD00638387	DRR511817	Tokyo	Japan	2017		non-invasive infections	non-invasive		NA	B3264		89		101
151		7155	TK68	SAMD00638388	DRR511818	Tokyo	Japan	2017		non-invasive infections	non-invasive		NA	B3264		89		101
152		7198	TK69	SAMD00638389	DRR511819	Tokyo	Japan	2017		non-invasive infections	non-invasive		NA	B3264		89		101
153		7201	TK70	SAMD00638390	DRR511820	Tokyo	Japan	2017		non-invasive infections	non-invasive		NA	B3264		89		101
154		7306	TK71	SAMD00638391	DRR511821	Tokyo	Japan	2017		non-invasive infections	non-invasive		NA	B3264		89		101
155		7433	TK72	SAMD00638392	DRR511822	Tokyo	Japan	2017		non-invasive infections	non-invasive		NA	B3264		89		101
156		7434	TK73	SAMD00638393	DRR511823	Tokyo	Japan	2017		non-invasive infections	non-invasive		NA	B3264		89		101
157		7437	TK74	SAMD00638394	DRR511824	Tokyo	Japan	2017		non-invasive infections	non-invasive		NA	B3264		89		101
158		7559	TK75	SAMD00638395	DRR511825	Tokyo	Japan	2017		non-invasive infections	non-invasive		NA	B3264		89		101
159		7596	TK76	SAMD00638396	DRR511826	Tokyo	Japan	2017		non-invasive infections	non-invasive		NA	B3264		89		101
160		7659	TK77	SAMD00638397	DRR511827	Tokyo	Japan	2017		non-invasive infections	non-invasive		NA	B3264		89		101
161		7789	TK78	SAMD00638398	DRR511828	Tokyo	Japan	2018		non-invasive infections	non-invasive		NA	B3264		89		101
162		7816	TK79	SAMD00638399	DRR511829	Tokyo	Japan	2018		non-invasive infections	non-invasive		NA	B3264		89		101
163		7817	TK80	SAMD00638400	DRR511830	Tokyo	Japan	2018		non-invasive infections	non-invasive		NA	B3264		89		101
164		7868	TK81	SAMD00638401	DRR511831	Tokyo	Japan	2018		non-invasive infections	non-invasive		NA	B3264		89		101
165		7884	TK82	SAMD00638402	DRR511832	Tokyo	Japan	2018		non-invasive infections	non-invasive		NA	B3264		89		101
166		7886	TK83	SAMD00638403	DRR511833	Tokyo	Japan	2018		non-invasive infections	non-invasive		NA	B3264		89		101
167		7938	TK84	SAMD00638404	DRR511834	Tokyo	Japan	2018		non-invasive infections	non-invasive		NA	B3264		89		101
168		7939	TK85	SAMD00638405	DRR511835	Tokyo	Japan	2018		non-invasive infections	non-invasive		NA	B3264		89		101
169		7994	TK86	SAMD00638406	DRR511836	Tokyo	Japan	2018		non-invasive infections	non-invasive		NA	B3264		89		101
170		8006	TK87	SAMD00638407	DRR511837	Tokyo	Japan	2018		non-invasive infections	non-invasive		NA	B3264		89		646
171		8051	TK88	SAMD00638408	DRR511838	Tokyo	Japan	2018		non-invasive infections	non-invasive		NA	B3264		89		101
172		8057	TK89	SAMD00638409	DRR511839	Tokyo	Japan	2018		non-invasive infections	non-invasive		NA	B3264		89		646
173		8131	TK90	SAMD00638410	DRR511840	Tokyo	Japan	2018		non-invasive infections	non-invasive		NA	B3264		89		101
174		8202	TK91	SAMD00638411	DRR511841	Tokyo	Japan	2018		non-invasive infections	non-invasive		NA	B3264		89		101
175		8273	TK92	SAMD00638412	DRR511842	Tokyo	Japan	2018		non-invasive infections	non-invasive		NA	B3264		89		646
176		8274	TK93	SAMD00638413	DRR511843	Tokyo	Japan	2018		non-invasive infections	non-invasive		NA	B3264		89		646
177		8275	TK94	SAMD00638414	DRR511844	Tokyo	Japan	2018		non-invasive infections	non-invasive		NA	B3264		89		101
178		8339	TK95	SAMD00638415	DRR511845	Tokyo	Japan	2018		non-invasive infections	non-invasive		NA	B3264		89		646
179		8342	TK96	SAMD00638416	DRR511846	Tokyo	Japan	2018		non-invasive infections	non-invasive		NA	B3264		89		101
180		8431	TK97	SAMD00638417	DRR511847	Tokyo	Japan	2018		non-invasive infections	non-invasive		NA	B3264		89		646
181		8498	TK98	SAMD00638418	DRR511848	Tokyo	Japan	2018		non-invasive infections	non-invasive		NA	B3264		89		101
182		8499	TK99	SAMD00638419	DRR511849	Tokyo	Japan	2018		non-invasive infections	non-invasive		NA	B3264		89		101
183		8540	TK100	SAMD00638420	DRR511850	Tokyo	Japan	2018		non-invasive infections	non-invasive		NA	B3264		89		101
184		8575	TK101	SAMD00638421	DRR511851	Tokyo	Japan	2018		non-invasive infections	non-invasive		NA	B3264		89		646
185		8598	TK102	SAMD00638422	DRR511852	Tokyo	Japan	2018		non-invasive infections	non-invasive		NA	B3264		89		101
186		8704	TK103	SAMD00638423	DRR511853	Tokyo	Japan	2019		non-invasive infections	non-invasive		NA	B3265		89		101
187		8738	TK104	SAMD00638424	DRR511854	Tokyo	Japan	2019		non-invasive infections	non-invasive		NA	B3266		89		101
188		8769	TK105	SAMD00638425	DRR511855	Tokyo	Japan	2019		non-invasive infections	non-invasive		NA	B3267		89		101
189		8772	TK106	SAMD00638426	DRR511856	Tokyo	Japan	2019		non-invasive infections	non-invasive		NA	B3268		89		101
190		8773	TK107	SAMD00638427	DRR511857	Tokyo	Japan	2019		non-invasive infections	non-invasive		NA	B3269		89		101
191		8794	TK108	SAMD00638428	DRR511858	Tokyo	Japan	2019		non-invasive infections	non-invasive		NA	B3270		89		101
192		8796	TK109	SAMD00638429	DRR511859	Tokyo	Japan	2019		non-invasive infections	non-invasive		NA	B3271		89		101
193		8853	TK110	SAMD00638430	DRR511860	Tokyo	Japan	2019		non-invasive infections	non-invasive		NA	B3272		89		28
194		8886	TK111	SAMD00638431	DRR511861	Tokyo	Japan	2019		non-invasive infections	non-invasive		NA	B3273		89		101
195		8926	TK112	SAMD00638432	DRR511862	Tokyo	Japan	2019		non-invasive infections	non-invasive		NA	B3274		89		101
196		8964	TK113	SAMD00638433	DRR511863	Tokyo	Japan	2019		non-invasive infections	non-invasive		NA	B3275		89		101
197		9011	TK114	SAMD00638434	DRR511864	Tokyo	Japan	2019		non-invasive infections	non-invasive		NA	B3276		89		101
198		9108	TK115	SAMD00638435	DRR511865	Tokyo	Japan	2019		non-invasive infections	non-invasive		NA	B3277		89		101
199		9176	TK116	SAMD00638436	DRR511866	Tokyo	Japan	2019		non-invasive infections	non-invasive		NA	B3278		89		101
200		9178	TK117	SAMD00638437	DRR511867	Tokyo	Japan	2019		non-invasive infections	non-invasive		NA	B3279		89		101
201		9213	TK118	SAMD00638438	DRR511868	Tokyo	Japan	2019		non-invasive infections	non-invasive		NA	B3280		89		101
202		9350	TK119	SAMD00638439	DRR511869	Tokyo	Japan	2019		non-invasive infections	non-invasive		NA	B3281		89		646
203		9409	TK120	SAMD00638440	DRR511870	Tokyo	Japan	2020		non-invasive infections	non-invasive		NA	B3282		89		101
204		9417	TK121	SAMD00638441	DRR511871	Tokyo	Japan	2020		non-invasive infections	non-invasive		NA	B3283		89		646
205		9418	TK122	SAMD00638442	DRR511872	Tokyo	Japan	2020		non-invasive infections	non-invasive		NA	B3284		89		101
206		9446	TK123	SAMD00638443	DRR511873	Tokyo	Japan	2020		non-invasive infections	non-invasive		NA	B3285		89		101
207		9481	TK124	SAMD00638444	DRR511874	Tokyo	Japan	2020		non-invasive infections	non-invasive		NA	B3286		89		101

## Sheet: Table S4
Table S4. Comparison of clustering on the phylogenetic trees for the Japanese and global cohorts.
Clusters	A		B1		B2		B3
Japanese	2		2		3		416
Global	19		2		5		639
Standard residuals	-4.33		-1.85		-2		5.14
Chi-squared test	p = 0.13

## Sheet: Table S5
Table S5. Pan-GWAS on SNPs/indels for the Japanese cohort. Genes are loci where significant SNPs/indels were detected. Location is the position of each SNP/indel in the core gene alignment. Position is the position in each locus. Nucleotide is expressed as the wild-type allele on the left of “>” and the mutant allele on the right, respectively. “-” means a nucleotide deletion. Residue indicates t…
Genes	Location		Position		Nucleotide	Residue	Allele freq.		p-value		Effect size		Function
covS	1135354		39		C>-	N>-	0.0645		1.77e-07		3.94		Adaptive-response sensory-kinase
covS	1135355		40		T>-	I>-	0.0645		1.77e-07		3.94		Adaptive-response sensory-kinase
covS	1135361		46		C>-	R>-	0.0645		1.77e-07		3.94		Adaptive-response sensory-kinase
covS	1135440		125		C>-	H>-	0.0581		1.15e-06		3.8		Adaptive-response sensory-kinase
gatA	258326		874		G>A	V>I	0.0806		3.74e-05		-2.94		Glutamyl-tRNA(Gln) amidotransferase subunit A
group_1102	314333		109		G>A	V>I	0.0806		3.74e-05		-2.94		Hypothetical protein/putative peptidase
group_647	600257		94		C>A	P>T	0.0806		3.74e-05		-2.94		Hypothetical protein
iscS_1	716248		1018		C>A	R>S	0.0806		3.74e-05		-2.94		Cysteine desulfurase IscS
recU	1047062		405		C>T	V>V	0.0806		3.74e-05		-2.94		Holliday junction resolvase RecU
tagU_1	1184662		953		C>A	P>Q	0.0806		3.74e-05		-2.94		Polyisoprenyl-teichoic acid--peptidoglycan teichoic acid transferase TagU
fhuB	1274786		218		T>C	V>A	0.0677		5.05e-05		-2.5		Putative siderophore transport system permease protein YfiZ
group_3168	491353		482		A>G	D>G	0.123		0.000106		1.49		Hypothetical protein
group_751/srtC	621587		392		T>C	V>A	0.123		0.000106		1.49		Hypothetical protein/Sortase protein
mutL	843507		1273		G>A	G>R	0.123		0.000106		1.49		DNA mismatch repair protein MutL
group_49	572262		1264		A>-	->-	0.548		0.000133		1.01		Hypothetical protein
group_49	572285		1287		C>-	->-	0.548		0.000133		1.01		Hypothetical protein
group_134	342429		89		A>-	E>-	0.0258		0.000219		3.53		Hypothetical protein

## Sheet: Table S6
Table S6. Pan-GWAS on SNPs/indels for the global cohort. Genes are loci where significant SNPs/indels were detected. Location is the position of each SNP/indel in the core gene alignment. Position is the position in each locus. Nucleotide is expressed as the wild-type allele on the left of “>” and the mutant allele on the right, respectively. “-” means a nucleotide deletion. Residue indicates the…
Genes	Location		Position		Nucleotide	Residue	Allele freq.		p-value		Effect size		Function
lacE	677614		1661		G>T	G>V	0.105		1.35e-14		3.47		PTS system lactose-specific EIICB component
gatA	248353		874		G>A	V>I	0.0377		1.12e-10		-3.35		Glutamyl-tRNA(Gln) amidotransferase subunit A
group_1009	295467		109		G>A	V>I	0.0377		1.12e-10		-3.35		Hypothetical protein
group_274	441823		94		C>A	P>T	0.0377		1.12e-10		-3.35		Hypothetical protein
iscS_1	662673		1018		C>A	R>S	0.0377		1.12e-10		-3.35		Cysteine desulfurase IscS
recU	983611		405		C>T	V>V	0.0377		1.12e-10		-3.35		Holliday junction resolvase RecU
fhuD	218429		538		G>A	V>I	0.0858		4.3e-10		-1.84		Iron(3+)-hydroxamate-binding protein FhuD
group_4706	555162		389		A>G	D>G	0.0858		4.3e-10		-1.84		Hypothetical protein
group_589	580130		1531		->G	->-	0.0949		3.91e-09		-1.68		Putative RNA methyltransferase
fhuB	1200862		218		T>C	V>A	0.0316		3.93e-09		-3.27		Putative siderophore transport system permease protein YfiZ
group_589	580091		1492		->G	->-	0.105		8.49e-09		-1.56		Putative RNA methyltransferase
group_589	580123		1524		->T	->-	0.105		8.49e-09		-1.56		Putative RNA methyltransferase
group_589	580128		1529		->A	->-	0.105		8.49e-09		-1.56		Putative RNA methyltransferase
group_589	580108		1509		->-	->-	0.104		1.84e-08		-1.54		Putative RNA methyltransferase
covS	1068053		39		T>-	N>-	0.0542		2.14e-08		3.8		Adaptive-response sensory-kinase SasA
covS	1068054		40		T>-	S>-	0.0542		2.14e-08		3.8		Adaptive-response sensory-kinase SasA
covS	1068060		46		C>-	P>-	0.0542		2.14e-08		3.8		Adaptive-response sensory-kinase SasA
covS	1068070		56		T>-	L>-	0.0542		2.14e-08		3.8		Adaptive-response sensory-kinase SasA
group_589	580129		1530		->A	->-	0.0904		2.89e-08		-1.58		Putative RNA methyltransferase
group_589	580138		1539		->T	->-	0.0889		3.2e-08		-1.59		Putative RNA methyltransferase
covS	1068113		99		C>-	A>-	0.0527		3.48e-08		3.77		Adaptive-response sensory-kinase SasA
celB	100502		1141		T>G	W>G	0.0602		5.23e-08		2.82		PTS system cellobiose-specific EIIC component
covS	1068138		124		G>-	T>-	0.0512		5.54e-08		3.74		Adaptive-response sensory-kinase SasA
covS	1068139		125		C>-	T>-	0.0512		5.54e-08		3.74		Adaptive-response sensory-kinase SasA
covS	1068159		145		T>-	K>-	0.0512		5.54e-08		3.74		Adaptive-response sensory-kinase SasA
group_334	447243		1317		C>A	V>V	0.955		7.21e-08		5.97		Hypothetical protein
group_334	447364		1438		G>A	V>I	0.955		7.21e-08		5.97		Hypothetical protein
group_589	580093		1494		->G	->-	0.0979		7.34e-08		-1.47		Putative RNA methyltransferase
citF	104961		698		C>A	A>D	0.0617		1.15e-07		-1.83		Citrate lyase alpha chain
group_571	572046		1325		A>G	K>R	0.0617		1.43e-07		-1.81		Hypothetical protein
bcrA_2	73632		798		G>T	V>V	0.0211		2.43e-07		-10.5		Bacitracin transport ATP-binding protein BcrA
dhfR	157838		142		A>G	M>V	0.0211		2.43e-07		-10.5		Dihydrofolate reductase
gap	245943		618		C>T	N>N	0.0211		2.43e-07		-10.5		Glyceraldehyde-3-phosphate dehydrogenase
glpK	272208		447		G>T	V>V	0.0211		2.43e-07		-10.5		Glycerol kinase
glpK	272211		450		A>T	P>P	0.0211		2.43e-07		-10.5		Glycerol kinase
group_4423	495622		1800		T>C	Q>H	0.0211		2.43e-07		-10.5		Hypothetical protein
group_4533	519181		1026		G>A	A>A	0.0211		2.43e-07		-10.5		Hypothetical protein
group_4668	544734		683		A>C	N>T	0.0211		2.43e-07		-10.5		Hypothetical protein
group_902	606912		126		T>C	D>D	0.0211		2.43e-07		-10.5		Hypothetical protein
murE	771840		441		T>C	T>T	0.0211		2.43e-07		-10.5		UDP-N-acetylmuramoyl-L-alanyl-D-glutamate--L-lysine ligase
prfB	911588		366		T>C	E>D	0.0211		2.43e-07		-10.5		Peptide chain release factor 2
pyrDA	953208		810		T>G	G>G	0.0211		2.43e-07		-10.5		Putative dihydroorotate dehydrogenase A (fumarate)
radA	961623		57		A>G	K>K	0.0211		2.43e-07		-10.5		DNA repair protein RadA
rsmG	1059163		47		T>C	L>S	0.0211		2.43e-07		-10.5		Ribosomal RNA small subunit methyltransferase G
rsmG	1059164		48		A>C	L>F	0.0211		2.43e-07		-10.5		Ribosomal RNA small subunit methyltransferase G
rsmG	1059255		139		A>G	K>E	0.0211		2.43e-07		-10.5		Ribosomal RNA small subunit methyltransferase G
rsmG	1059263		147		A>G	E>E	0.0211		2.43e-07		-10.5		Ribosomal RNA small subunit methyltransferase G
typA	1151787		714		T>G	V>V	0.0211		2.43e-07		-10.5		GTP-binding protein TypA/BipA
group_589	580137		1538		->A	->-	0.0648		2.58e-07		-1.74		Putative RNA methyltransferase
group_589	579922		1323		C>T	H>H	0.0768		2.99e-07		-1.63		Putative RNA methyltransferase
group_589	580088		1489		->A	->-	0.0768		2.99e-07		-1.63		Putative RNA methyltransferase
group_1069	305138		326		C>A	T>N	0.0633		3.2e-07		-1.73		Hypothetical protein
group_589	580085		1486		->A	->-	0.0663		3.2e-07		-1.7		Putative RNA methyltransferase
group_589	580092		1493		->C	->-	0.0798		3.26e-07		-1.59		Putative RNA methyltransferase
group_1388	341066		543		C>T	V>V	0.0422		6.35e-07		3.58		Hypothetical protein
group_4411	492028		840		C>T	D>D	0.0422		6.35e-07		3.58		Hypothetical protein
group_589	580135		1536		->A	->-	0.0648		7e-07		-1.66		Putative RNA methyltransferase
group_589	580086		1487		->C	->-	0.0678		7.82e-07		-1.62		Putative RNA methyltransferase
gatC_1	250443		57		C>T	F>F	0.0196		7.9e-07		-10.4		Glutamyl-tRNA(Gln) amidotransferase subunit C
glpK	273121		1360		A>G	Y>D	0.0196		7.9e-07		-10.4		Glycerol kinase
group_4258	470320		282		G>C	G>G	0.0196		7.9e-07		-10.4		Putative metallo-hydrolase
group_570	569107		132		T>C	H>H	0.0196		7.9e-07		-10.4		Hypothetical protein
nrdE2	807259		225		T>C	H>H	0.0196		7.9e-07		-10.4		Ribonucleoside-diphosphate reductase subunit alpha 2
queG	960292		1120		G>T	V>F	0.0196		7.9e-07		-10.4		Epoxyqueuosine reductase
group_947	609962		86		C>G	A>G	0.959		8.17e-07		6.59		Hypothetical protein
arcB	43449		840		C>T	N>N	0.0196		9.67e-07		-10.3		Ornithine carbamoyltransferase
arcC1	44505		882		C>T	I>I	0.0196		9.67e-07		-10.3		Carbamate kinase 1
atpD	67602		1047		T>G	R>R	0.0196		9.67e-07		-10.3		ATP synthase subunit beta
group_1008	294461		837		G>A	Q>Q	0.0196		9.67e-07		-10.3		Hypothetical protein
group_1008	294476		852		C>T	F>F	0.0196		9.67e-07		-10.3		Hypothetical protein
group_1008	294484		860		T>C	M>T	0.0196		9.67e-07		-10.3		Hypothetical protein
group_1008	294485		861		G>A	M>T	0.0196		9.67e-07		-10.3		Hypothetical protein
group_1008	294488		864		A>G	G>G	0.0196		9.67e-07		-10.3		Hypothetical protein
group_1008	294503		879		T>G	L>L	0.0196		9.67e-07		-10.3		Hypothetical protein
group_1008	294513		889		C>T	L>F	0.0196		9.67e-07		-10.3		Hypothetical protein
group_1008	294516		892		A>G	T>A	0.0196		9.67e-07		-10.3		Hypothetical protein
group_1008	294518		894		G>A	T>A	0.0196		9.67e-07		-10.3		Hypothetical protein
group_1008	294522		898		A>G	I>V	0.0196		9.67e-07		-10.3		Hypothetical protein
group_1008	294524		900		T>C	I>V	0.0196		9.67e-07		-10.3		Hypothetical protein
group_1008	294536		912		T>C	R>R	0.0196		9.67e-07		-10.3		Hypothetical protein
group_1008	294538		914		A>G	K>R	0.0196		9.67e-07		-10.3		Hypothetical protein
group_1209	325599		330		A>G	D>E	0.0196		9.67e-07		-10.3		Putative NAD(P)H nitroreductase
ktrA	669590		417		T>C	I>I	0.0196		9.67e-07		-10.3		Ktr system potassium uptake protein A
lacF_2	678800		831		T>C	Y>Y	0.0196		9.67e-07		-10.3		Lactose transport system permease protein LacF
lacF_2	678836		867		T>C	Y>Y	0.0196		9.67e-07		-10.3		Lactose transport system permease protein LacF
purR_2	948024		249		C>T	I>I	0.0196		9.67e-07		-10.3		Pur operon repressor
group_1563	381783		1313		G>T	R>I	0.0708		1.04e-06		-1.56		Hypothetical protein
group_1571	385352		343		C>T	P>S	0.0708		1.04e-06		-1.56		Hypothetical protein
hel	630368		799		C>T	L>L	0.0708		1.04e-06		-1.56		Holliday junction ATP-dependent DNA helicase RuvA
trmFO	1139488		219		G>A	K>K	0.0708		1.04e-06		-1.56		Methylenetetrahydrofolate--tRNA-(uracil-5-)-methyltransferase TrmFO
nrdE2	808655		1621		G>A	D>N	0.959		1.34e-06		6.34		Ribonucleoside-diphosphate reductase subunit alpha 2
group_589	580125		1526		->C	->-	0.0723		2.38e-06		-1.49		Putative RNA methyltransferase
group_589	580127		1528		->A	->-	0.0753		2.48e-06		-1.46		Putative RNA methyltransferase
accA	3069		255		T>G	R>R	0.961		2.63e-06		6.52		Acetyl-coenzyme A carboxylase carboxyl transferase subunit alpha
accA	3075		261		T>C	A>A	0.961		2.63e-06		6.52		Acetyl-coenzyme A carboxylase carboxyl transferase subunit alpha
accA	3076		262		T>C	L>L	0.961		2.63e-06		6.52		Acetyl-coenzyme A carboxylase carboxyl transferase subunit alpha
accA	3078		264		G>A	L>L	0.961		2.63e-06		6.52		Acetyl-coenzyme A carboxylase carboxyl transferase subunit alpha
accA	3081		267		C>T	R>R	0.961		2.63e-06		6.52		Acetyl-coenzyme A carboxylase carboxyl transferase subunit alpha
accA	3082		268		C>T	L>L	0.961		2.63e-06		6.52		Acetyl-coenzyme A carboxylase carboxyl transferase subunit alpha
accA	3084		270		T>A	L>L	0.961		2.63e-06		6.52		Acetyl-coenzyme A carboxylase carboxyl transferase subunit alpha
accA	3120		306		G>C	V>V	0.961		2.63e-06		6.52		Acetyl-coenzyme A carboxylase carboxyl transferase subunit alpha
accA	3144		330		C>T	A>A	0.961		2.63e-06		6.52		Acetyl-coenzyme A carboxylase carboxyl transferase subunit alpha
accA	3153		339		T>A	G>G	0.961		2.63e-06		6.52		Acetyl-coenzyme A carboxylase carboxyl transferase subunit alpha
accA	3156		342		C>T	V>V	0.961		2.63e-06		6.52		Acetyl-coenzyme A carboxylase carboxyl transferase subunit alpha
accA	3165		351		A>G	E>E	0.961		2.63e-06		6.52		Acetyl-coenzyme A carboxylase carboxyl transferase subunit alpha
accA	3255		441		A>G	G>G	0.961		2.63e-06		6.52		Acetyl-coenzyme A carboxylase carboxyl transferase subunit alpha
accC	4311		225		C>G	A>A	0.961		2.63e-06		6.52		Biotin carboxylase
accD	6024		573		G>A	V>V	0.961		2.63e-06		6.52		Acetyl-coenzyme A carboxylase carboxyl transferase subunit beta
adhE	18024		463		G>A	A>T	0.961		2.63e-06		6.52		Aldehyde-alcohol dehydrogenase
agaA	21527		684		A>G	G>G	0.961		2.63e-06		6.52		N-acetylgalactosamine-6-phosphate deacetylase
agaC_1	22301		309		G>A	L>L	0.961		2.63e-06		6.52		N-acetylgalactosamine permease IIC component 1
appA	38107		1558		G>A	H>N	0.961		2.63e-06		6.52		Hypothetical protein
argR_3	45733		205		G>T	A>S	0.961		2.63e-06		6.52		Arginine repressor
aroE_2	53433		105		G>T	L>L	0.961		2.63e-06		6.52		Shikimate dehydrogenase (NADP(+))
arsC	54801		102		T>C	Y>Y	0.961		2.63e-06		6.52		Arsenate reductase
artM_2	56439		558		C>T	D>D	0.961		2.63e-06		6.52		Arginine transport ATP-binding protein ArtM
aspB	60762		1113		G>A	L>L	0.961		2.63e-06		6.52		Asparagine--oxo-acid transaminase
aspS	61909		1066		G>A	D>N	0.961		2.63e-06		6.52		Aspartate--tRNA ligase
atpC	66522		384		C>T	R>R	0.961		2.63e-06		6.52		ATP synthase epsilon chain
atpD	66699		144		T>A	A>A	0.961		2.63e-06		6.52		ATP synthase subunit beta
atpF	68526		366		T>C	I>I	0.961		2.63e-06		6.52		ATP synthase subunit b
bcrA_2	73065		231		G>A	E>E	0.961		2.63e-06		6.52		Bacitracin transport ATP-binding protein BcrA
bdhA	74507		770		C>T	T>I	0.961		2.63e-06		6.52		D-beta-hydroxybutyrate dehydrogenase
bglF_1	79926		1272		T>G	T>T	0.961		2.63e-06		6.52		Hypothetical protein
bglF_1	80464		1810		G>A	A>T	0.961		2.63e-06		6.52		Hypothetical protein
clpC_2	112150		2130		C>T	I>I	0.961		2.63e-06		6.52		ATP-dependent Clp protease ATP-binding subunit ClpC
clpE	114580		2115		G>A	R>R	0.961		2.63e-06		6.52		ATP-dependent Clp protease ATP-binding subunit ClpE
codY	122483		409		A>G	N>D	0.961		2.63e-06		6.52		GTP-sensing transcriptional pleiotropic repressor CodY
copA	129066		1237		A>G	I>V	0.961		2.63e-06		6.52		Putative copper-importing P-type ATPase A
cutC_1	136484		1464		C>A	D>E	0.961		2.63e-06		6.52		Choline trimethylamine-lyase
def_2	149719		105		C>T	A>A	0.961		2.63e-06		6.52		Peptide deformylase
deoB	150139		114		C>T	T>T	0.961		2.63e-06		6.52		Phosphopentomutase
dexB	155564		889		G>A	E>K	0.961		2.63e-06		6.52		Glucan 1
dexB	156193		1518		T>C	G>G	0.961		2.63e-06		6.52		Glucan 1
dnaG	173883		53		C>T	S>F	0.961		2.63e-06		6.52		DNA primase
dppC	182542		132		C>T	L>L	0.961		2.63e-06		6.52		Dipeptide transport system permease protein DppC
dppC	182957		547		C>T	L>L	0.961		2.63e-06		6.52		Dipeptide transport system permease protein DppC
dppC	183088		678		G>A	L>L	0.961		2.63e-06		6.52		Dipeptide transport system permease protein DppC
dppC	183172		762		C>A	A>A	0.961		2.63e-06		6.52		Dipeptide transport system permease protein DppC
dtd3	186166		414		C>T	R>R	0.961		2.63e-06		6.52		D-aminoacyl-tRNA deacylase
dtd3	186190		438		G>A	E>E	0.961		2.63e-06		6.52		D-aminoacyl-tRNA deacylase
dut	187681		159		G>A	K>K	0.961		2.63e-06		6.52		Deoxyuridine 5'-triphosphate nucleotidohydrolase
eno	195907		894		C>T	N>N	0.961		2.63e-06		6.52		Annotation
ettA	199710		1229		C>T	T>I	0.961		2.63e-06		6.52		Energy-dependent translational throttle protein EttA
exoA	200791		432		T>C	I>I	0.961		2.63e-06		6.52		Exodeoxyribonuclease
exoA	200827		468		G>T	L>L	0.961		2.63e-06		6.52		Exodeoxyribonuclease
exoA	201085		726		G>C	W>C	0.961		2.63e-06		6.52		Exodeoxyribonuclease
exoA	201160		801		G>A	T>T	0.961		2.63e-06		6.52		Exodeoxyribonuclease
fabD	203095		183		G>T	T>T	0.961		2.63e-06		6.52		Malonyl CoA-acyl carrier protein transacylase
fabD	203098		186		A>G	Q>Q	0.961		2.63e-06		6.52		Malonyl CoA-acyl carrier protein transacylase
fabF	204649		798		C>T	A>A	0.961		2.63e-06		6.52		3-oxoacyl-[acyl-carrier-protein] synthase 2
fabZ	207655		69		G>A	V>V	0.961		2.63e-06		6.52		3-hydroxyacyl-[acyl-carrier-protein] dehydratase FabZ
ftsH	233442		876		T>C	G>G	0.961		2.63e-06		6.52		ATP-dependent zinc metalloprotease FtsH
ftsK	236755		2209		G>T	A>S	0.961		2.63e-06		6.52		DNA translocase FtsK
ftsY	239775		294		C>T	D>D	0.961		2.63e-06		6.52		Signal recognition particle receptor FtsY
gap	246106		781		G>T	A>S	0.961		2.63e-06		6.52		Glyceraldehyde-3-phosphate dehydrogenase
garK	246987		651		T>C	S>S	0.961		2.63e-06		6.52		Glycerate 2-kinase
gatC_1	250409		23		T>C	V>A	0.961		2.63e-06		6.52		Glutamyl-tRNA(Gln) amidotransferase subunit C
glpO	273452		163		C>G	Q>E	0.961		2.63e-06		6.52		Alpha-glycerophosphate oxidase
glpO	273463		174		T>C	S>S	0.961		2.63e-06		6.52		Alpha-glycerophosphate oxidase
glpO	273466		177		C>T	S>S	0.961		2.63e-06		6.52		Alpha-glycerophosphate oxidase
glpO	273469		180		T>G	R>R	0.961		2.63e-06		6.52		Alpha-glycerophosphate oxidase
glpO	273472		183		A>G	S>S	0.961		2.63e-06		6.52		Alpha-glycerophosphate oxidase
glpO	273487		198		C>T	H>H	0.961		2.63e-06		6.52		Alpha-glycerophosphate oxidase
glpO	273493		204		G>A	G>G	0.961		2.63e-06		6.52		Alpha-glycerophosphate oxidase
glpO	273511		222		A>G	Q>Q	0.961		2.63e-06		6.52		Alpha-glycerophosphate oxidase
glpO	273517		228		T>C	D>D	0.961		2.63e-06		6.52		Alpha-glycerophosphate oxidase
glpO	273520		231		G>T	V>V	0.961		2.63e-06		6.52		Alpha-glycerophosphate oxidase
glpO	273523		234		G>A	E>E	0.961		2.63e-06		6.52		Alpha-glycerophosphate oxidase
glpO	273526		237		G>C	V>V	0.961		2.63e-06		6.52		Alpha-glycerophosphate oxidase
glpO	273529		240		T>C	V>V	0.961		2.63e-06		6.52		Alpha-glycerophosphate oxidase
glpO	273538		249		G>T	T>T	0.961		2.63e-06		6.52		Alpha-glycerophosphate oxidase
glpO	273541		252		G>T	V>V	0.961		2.63e-06		6.52		Alpha-glycerophosphate oxidase
glpO	273547		258		G>A	E>E	0.961		2.63e-06		6.52		Alpha-glycerophosphate oxidase
glpO	273550		261		G>T	R>R	0.961		2.63e-06		6.52		Alpha-glycerophosphate oxidase
glpO	273559		270		G>C	V>V	0.961		2.63e-06		6.52		Alpha-glycerophosphate oxidase
glpO	273565		276		A>G	Q>Q	0.961		2.63e-06		6.52		Alpha-glycerophosphate oxidase
glpO	273574		285		C>T	P>P	0.961		2.63e-06		6.52		Alpha-glycerophosphate oxidase
glpO	273577		288		C>T	H>H	0.961		2.63e-06		6.52		Alpha-glycerophosphate oxidase
glpO	273583		294		A>T	P>P	0.961		2.63e-06		6.52		Alpha-glycerophosphate oxidase
glpO	273586		297		A>G	K>K	0.961		2.63e-06		6.52		Alpha-glycerophosphate oxidase
glpO	273592		303		C>T	D>D	0.961		2.63e-06		6.52		Alpha-glycerophosphate oxidase
glpO	273767		478		T>C	L>L	0.961		2.63e-06		6.52		Alpha-glycerophosphate oxidase
glpO	273781		492		G>C	G>G	0.961		2.63e-06		6.52		Alpha-glycerophosphate oxidase
glpO	273808		519		C>T	D>D	0.961		2.63e-06		6.52		Alpha-glycerophosphate oxidase
gltX	275656		528		C>T	I>I	0.961		2.63e-06		6.52		Glutamate--tRNA ligase
gltX	275698		570		A>G	Q>Q	0.961		2.63e-06		6.52		Glutamate--tRNA ligase
gltX	275701		573		G>A	K>K	0.961		2.63e-06		6.52		Glutamate--tRNA ligase
gltX	275710		582		C>T	G>G	0.961		2.63e-06		6.52		Glutamate--tRNA ligase
gltX	275722		594		T>C	Y>Y	0.961		2.63e-06		6.52		Glutamate--tRNA ligase
gltX	275731		603		C>G	A>A	0.961		2.63e-06		6.52		Glutamate--tRNA ligase
gltX	275740		612		T>A	V>V	0.961		2.63e-06		6.52		Glutamate--tRNA ligase
gltX	275746		618		T>C	D>D	0.961		2.63e-06		6.52		Glutamate--tRNA ligase
gltX	275752		624		T>C	D>D	0.961		2.63e-06		6.52		Glutamate--tRNA ligase
gltX	275764		636		T>A	S>S	0.961		2.63e-06		6.52		Glutamate--tRNA ligase
gltX	275767		639		C>T	H>H	0.961		2.63e-06		6.52		Glutamate--tRNA ligase
gltX	275779		651		C>G	G>G	0.961		2.63e-06		6.52		Glutamate--tRNA ligase
gltX	275791		663		T>A	I>I	0.961		2.63e-06		6.52		Glutamate--tRNA ligase
glyA	277145		571		G>A	A>T	0.961		2.63e-06		6.52		Serine hydroxymethyltransferase
glyS	279655		906		T>C	N>N	0.961		2.63e-06		6.52		Glycine--tRNA ligase beta subunit
group_1008	293664		40		G>A	V>I	0.961		2.63e-06		6.52		Hypothetical protein
group_1061	304429		1528		A>T	N>Y	0.961		2.63e-06		6.52		Putative ABC transporter ATP-binding/permease protein
group_1094	315299		205		C>T	L>F	0.961		2.63e-06		6.52		Hypothetical protein
group_1099	316391		78		A>G	F>L	0.961		2.63e-06		6.52		Hypothetical protein
group_1161	324061		574		G>A	V>I	0.961		2.63e-06		6.52		Putative response regulatory protein
group_1161	324184		697		G>A	V>I	0.961		2.63e-06		6.52		Putative response regulatory protein
group_1161	324218		731		G>A	G>D	0.961		2.63e-06		6.52		Putative response regulatory protein
group_1418	348263		1578		G>T	E>D	0.961		2.63e-06		6.52		Hypothetical protein
group_1442	353799		603		G>T	L>F	0.961		2.63e-06		6.52		Hypothetical protein
group_1455	360230		356		A>C	K>T	0.961		2.63e-06		6.52		Hypothetical protein
group_1487	365313		345		G>A	Q>Q	0.961		2.63e-06		6.52		Hypothetical protein
group_1537	372088		496		A>G	L>V	0.961		2.63e-06		6.52		Hypothetical protein
group_1537	372796		1204		G>T	Q>*	0.961		2.63e-06		6.52		Hypothetical protein
group_1538	373435		507		G>A	F>L	0.961		2.63e-06		6.52		Hypothetical protein
group_1628	397561		330		T>C	V>V	0.961		2.63e-06		6.52		Hypothetical protein
group_1742	407412		1122		C>T	K>N	0.961		2.63e-06		6.52		Hypothetical protein
group_372	447894		255		G>A	V>V	0.961		2.63e-06		6.52		Hypothetical protein
group_372	448230		591		C>G	A>A	0.961		2.63e-06		6.52		Hypothetical protein
group_372	448267		628		G>A	D>N	0.961		2.63e-06		6.52		Hypothetical protein
group_372	448568		929		C>T	T>M	0.961		2.63e-06		6.52		Hypothetical protein
group_4246	467581		1044		A>G	E>E	0.961		2.63e-06		6.52		Putative protein
group_4257	469509		380		T>C	F>S	0.961		2.63e-06		6.52		Hypothetical protein
group_4412	492820		270		G>A	R>R	0.961		2.63e-06		6.52		Hypothetical protein
group_4412	492943		393		A>G	E>E	0.961		2.63e-06		6.52		Hypothetical protein
group_4412	492965		415		C>A	H>N	0.961		2.63e-06		6.52		Hypothetical protein
group_4423	494566		744		T>A	G>G	0.961		2.63e-06		6.52		Hypothetical protein
group_4423	495133		1311		G>A	K>K	0.961		2.63e-06		6.52		Hypothetical protein
group_4423	495244		1422		T>C	A>A	0.961		2.63e-06		6.52		Hypothetical protein
group_4423	495362		1540		C>T	D>Y	0.961		2.63e-06		6.52		Hypothetical protein
group_4504	511294		1296		A>G	L>L	0.961		2.63e-06		6.52		Hypothetical protein
group_4504	512065		2067		C>A	G>G	0.961		2.63e-06		6.52		Hypothetical protein
group_4533	519220		1065		T>G	T>T	0.961		2.63e-06		6.52		Hypothetical protein
group_4554	521515		744		A>G	E>E	0.961		2.63e-06		6.52		Hypothetical protein
group_4562	522882		467		C>A	A>E	0.961		2.63e-06		6.52		Hypothetical protein
group_4587	528854		883		G>A	E>K	0.961		2.63e-06		6.52		Hypothetical protein
group_4626	536212		411		G>A	A>A	0.961		2.63e-06		6.52		Phosphomevalonate kinase
group_4668	544930		879		C>T	H>H	0.961		2.63e-06		6.52		Hypothetical protein
group_4670	545622		437		A>G	E>G	0.961		2.63e-06		6.52		Hypothetical protein
group_4676	547638		407		A>C	D>A	0.961		2.63e-06		6.52		Hypothetical protein
group_4696	554059		477		A>G	P>P	0.961		2.63e-06		6.52		Putative ABC transporter ATP-binding protein
group_588	578266		174		A>T	K>N	0.961		2.63e-06		6.52		Hypothetical protein
group_657	590471		363		A>G	K>K	0.961		2.63e-06		6.52		Hypothetical protein
group_673	592071		36		C>T	D>D	0.961		2.63e-06		6.52		Hypothetical protein
group_712	594394		523		A>C	D>H	0.961		2.63e-06		6.52		Hypothetical protein
group_737	597280		411		C>T	V>V	0.961		2.63e-06		6.52		Hypothetical protein
group_737	597295		426		G>T	G>G	0.961		2.63e-06		6.52		Hypothetical protein
group_737	597308		439		G>A	A>T	0.961		2.63e-06		6.52		Hypothetical protein
group_737	597310		441		T>A	A>T	0.961		2.63e-06		6.52		Hypothetical protein
group_737	597313		444		G>A	K>K	0.961		2.63e-06		6.52		Hypothetical protein
group_737	597348		479		C>T	T>I	0.961		2.63e-06		6.52		Hypothetical protein
group_737	597352		483		T>C	Y>Y	0.961		2.63e-06		6.52		Hypothetical protein
group_737	597370		501		C>G	S>R	0.961		2.63e-06		6.52		Hypothetical protein
group_752	602271		285		T>C	F>F	0.961		2.63e-06		6.52		Hypothetical protein
group_902	606915		129		C>T	Y>Y	0.961		2.63e-06		6.52		Hypothetical protein
group_902	607092		306		G>A	V>V	0.961		2.63e-06		6.52		Hypothetical protein
group_918	607407		195		G>T	L>F	0.961		2.63e-06		6.52		Hypothetical protein
gsiC	617954		409		G>A	V>I	0.961		2.63e-06		6.52		Glutathione transport system permease protein GsiC
gsiC	618064		519		C>T	S>S	0.961		2.63e-06		6.52		Glutathione transport system permease protein GsiC
gsiC	618154		609		T>C	I>I	0.961		2.63e-06		6.52		Glutathione transport system permease protein GsiC
gsiC	618322		777		A>G	E>E	0.961		2.63e-06		6.52		Glutathione transport system permease protein GsiC
gsiC	618397		852		A>C	G>G	0.961		2.63e-06		6.52		Glutathione transport system permease protein GsiC
gsiC	618467		922		C>T	L>F	0.961		2.63e-06		6.52		Glutathione transport system permease protein GsiC
hflX	632188		567		A>C	I>I	0.961		2.63e-06		6.52		GTPase HflX
hflX	632773		1152		A>G	D>E	0.961		2.63e-06		6.52		GTPase HflX
hmo	635454		889		G>A	D>N	0.961		2.63e-06		6.52		4-hydroxymandelate oxidase
hmo	635495		930		G>A	R>R	0.961		2.63e-06		6.52		4-hydroxymandelate oxidase
hmpT	636028		281		G>T	R>L	0.961		2.63e-06		6.52		Thiamine precursor transporter HmpT
kdgA	665947		204		A>G	V>V	0.961		2.63e-06		6.52		KHG/KDPG aldolase
kdgA	666229		486		C>T	G>G	0.961		2.63e-06		6.52		KHG/KDPG aldolase
kdgA	666232		489		A>G	G>G	0.961		2.63e-06		6.52		KHG/KDPG aldolase
kdgA	666233		490		G>A	V>I	0.961		2.63e-06		6.52		KHG/KDPG aldolase
kdgA	666240		497		C>T	S>L	0.961		2.63e-06		6.52		KHG/KDPG aldolase
lacC_1	673720		593		A>G	K>R	0.961		2.63e-06		6.52		Tagatose-6-phosphate kinase
lacC_1	673793		666		T>C	L>L	0.961		2.63e-06		6.52		Tagatose-6-phosphate kinase
lacR_3	681847		734		T>C	F>S	0.961		2.63e-06		6.52		Lactose phosphotransferase system repressor
lacZ	684537		2653		C>T	L>L	0.961		2.63e-06		6.52		Beta-galactosidase
lacZ	684786		2902		C>T	L>F	0.961		2.63e-06		6.52		Beta-galactosidase
lacZ	684867		2983		A>G	K>E	0.961		2.63e-06		6.52		Beta-galactosidase
lepA	689024		219		G>A	T>T	0.961		2.63e-06		6.52		Elongation factor 4
lepA	690074		1269		C>T	F>F	0.961		2.63e-06		6.52		Elongation factor 4
lepA	690587		1782		T>C	P>P	0.961		2.63e-06		6.52		Elongation factor 4
lepA	690608		1803		T>C	V>V	0.961		2.63e-06		6.52		Elongation factor 4
lepA	690623		1818		C>T	D>D	0.961		2.63e-06		6.52		Elongation factor 4
levE	693534		394		C>T	R>C	0.961		2.63e-06		6.52		PTS system fructose-specific EIIB component
licR_2	698638		285		C>A	R>R	0.961		2.63e-06		6.52		Putative licABCH operon regulator
licR_2	698941		588		T>C	V>V	0.961		2.63e-06		6.52		Putative licABCH operon regulator
licR_2	699574		1221		T>A	L>L	0.961		2.63e-06		6.52		Putative licABCH operon regulator
ligA	702346		1503		A>G	L>L	0.961		2.63e-06		6.52		DNA ligase
lysS	712186		519		A>G	E>E	0.961		2.63e-06		6.52		Lysine--tRNA ligase
lysS	712739		1072		C>T	H>Y	0.961		2.63e-06		6.52		Lysine--tRNA ligase
lytG	713675		61		A>C	I>L	0.961		2.63e-06		6.52		Exo-glucosaminidase LytG
lytG	714073		459		G>C	G>G	0.961		2.63e-06		6.52		Exo-glucosaminidase LytG
lytG	714151		537		C>T	V>V	0.961		2.63e-06		6.52		Exo-glucosaminidase LytG
malP	716231		2047		C>T	R>C	0.961		2.63e-06		6.52		Maltodextrin phosphorylase
manZ_1	720418		336		A>T	I>I	0.961		2.63e-06		6.52		PTS system mannose-specific EIID component
manZ_1	720424		342		A>C	G>G	0.961		2.63e-06		6.52		PTS system mannose-specific EIID component
manZ_1	720466		384		G>T	A>A	0.961		2.63e-06		6.52		PTS system mannose-specific EIID component
manZ_1	720472		390		T>A	G>G	0.961		2.63e-06		6.52		PTS system mannose-specific EIID component
manZ_1	720475		393		C>T	I>I	0.961		2.63e-06		6.52		PTS system mannose-specific EIID component
metC	730659		1029		C>T	L>L	0.961		2.63e-06		6.52		Cystathionine beta-lyase MetC
metG	731929		909		C>T	V>V	0.961		2.63e-06		6.52		Methionine--tRNA ligase
mltF_2	742054		563		T>C	V>A	0.961		2.63e-06		6.52		Membrane-bound lytic murein transglycosylase F
mtcA1	760901		38		C>T	A>V	0.961		2.63e-06		6.52		Beta-carbonic anhydrase 1
mtgA_1	761737		376		G>A	E>K	0.961		2.63e-06		6.52		Biosynthetic peptidoglycan transglycosylase
murE	771561		162		A>G	K>K	0.961		2.63e-06		6.52		UDP-N-acetylmuramoyl-L-alanyl-D-glutamate--L-lysine ligase
murE	771567		168		A>T	A>A	0.961		2.63e-06		6.52		UDP-N-acetylmuramoyl-L-alanyl-D-glutamate--L-lysine ligase
murE	771570		171		T>A	T>T	0.961		2.63e-06		6.52		UDP-N-acetylmuramoyl-L-alanyl-D-glutamate--L-lysine ligase
murE	771576		177		A>G	K>K	0.961		2.63e-06		6.52		UDP-N-acetylmuramoyl-L-alanyl-D-glutamate--L-lysine ligase
murE	771582		183		C>A	D>E	0.961		2.63e-06		6.52		UDP-N-acetylmuramoyl-L-alanyl-D-glutamate--L-lysine ligase
murE	771601		202		A>G	T>A	0.961		2.63e-06		6.52		UDP-N-acetylmuramoyl-L-alanyl-D-glutamate--L-lysine ligase
murE	771606		207		C>G	N>K	0.961		2.63e-06		6.52		UDP-N-acetylmuramoyl-L-alanyl-D-glutamate--L-lysine ligase
murE	771610		211		T>C	L>L	0.961		2.63e-06		6.52		UDP-N-acetylmuramoyl-L-alanyl-D-glutamate--L-lysine ligase
murE	771612		213		A>T	L>L	0.961		2.63e-06		6.52		UDP-N-acetylmuramoyl-L-alanyl-D-glutamate--L-lysine ligase
murE	771614		215		A>C	Q>P	0.961		2.63e-06		6.52		UDP-N-acetylmuramoyl-L-alanyl-D-glutamate--L-lysine ligase
murE	771615		216		A>T	Q>P	0.961		2.63e-06		6.52		UDP-N-acetylmuramoyl-L-alanyl-D-glutamate--L-lysine ligase
murE	771618		219		C>T	L>L	0.961		2.63e-06		6.52		UDP-N-acetylmuramoyl-L-alanyl-D-glutamate--L-lysine ligase
murE	771622		223		A>G	I>V	0.961		2.63e-06		6.52		UDP-N-acetylmuramoyl-L-alanyl-D-glutamate--L-lysine ligase
murE	771624		225		T>C	I>V	0.961		2.63e-06		6.52		UDP-N-acetylmuramoyl-L-alanyl-D-glutamate--L-lysine ligase
murE	771630		231		G>A	E>E	0.961		2.63e-06		6.52		UDP-N-acetylmuramoyl-L-alanyl-D-glutamate--L-lysine ligase
murE	771639		240		C>T	Y>Y	0.961		2.63e-06		6.52		UDP-N-acetylmuramoyl-L-alanyl-D-glutamate--L-lysine ligase
murE	771640		241		G>A	E>K	0.961		2.63e-06		6.52		UDP-N-acetylmuramoyl-L-alanyl-D-glutamate--L-lysine ligase
murE	771675		276		C>T	I>I	0.961		2.63e-06		6.52		UDP-N-acetylmuramoyl-L-alanyl-D-glutamate--L-lysine ligase
murE	771681		282		A>G	K>K	0.961		2.63e-06		6.52		UDP-N-acetylmuramoyl-L-alanyl-D-glutamate--L-lysine ligase
murE	771684		285		T>C	A>A	0.961		2.63e-06		6.52		UDP-N-acetylmuramoyl-L-alanyl-D-glutamate--L-lysine ligase
murE	771691		292		C>T	L>L	0.961		2.63e-06		6.52		UDP-N-acetylmuramoyl-L-alanyl-D-glutamate--L-lysine ligase
murE	771696		297		T>C	I>I	0.961		2.63e-06		6.52		UDP-N-acetylmuramoyl-L-alanyl-D-glutamate--L-lysine ligase
murE	771699		300		C>T	A>A	0.961		2.63e-06		6.52		UDP-N-acetylmuramoyl-L-alanyl-D-glutamate--L-lysine ligase
murE	771713		314		G>A	G>D	0.961		2.63e-06		6.52		UDP-N-acetylmuramoyl-L-alanyl-D-glutamate--L-lysine ligase
murE	771807		408		C>T	S>S	0.961		2.63e-06		6.52		UDP-N-acetylmuramoyl-L-alanyl-D-glutamate--L-lysine ligase
murE	771837		438		T>C	N>N	0.961		2.63e-06		6.52		UDP-N-acetylmuramoyl-L-alanyl-D-glutamate--L-lysine ligase
murE	771846		447		A>G	L>L	0.961		2.63e-06		6.52		UDP-N-acetylmuramoyl-L-alanyl-D-glutamate--L-lysine ligase
murE	771849		450		T>C	D>D	0.961		2.63e-06		6.52		UDP-N-acetylmuramoyl-L-alanyl-D-glutamate--L-lysine ligase
murE	771852		453		C>T	G>G	0.961		2.63e-06		6.52		UDP-N-acetylmuramoyl-L-alanyl-D-glutamate--L-lysine ligase
murE	771853		454		A>C	K>Q	0.961		2.63e-06		6.52		UDP-N-acetylmuramoyl-L-alanyl-D-glutamate--L-lysine ligase
murE	771855		456		G>A	K>Q	0.961		2.63e-06		6.52		UDP-N-acetylmuramoyl-L-alanyl-D-glutamate--L-lysine ligase
murE	771858		459		C>T	T>T	0.961		2.63e-06		6.52		UDP-N-acetylmuramoyl-L-alanyl-D-glutamate--L-lysine ligase
murE	771861		462		T>C	F>F	0.961		2.63e-06		6.52		UDP-N-acetylmuramoyl-L-alanyl-D-glutamate--L-lysine ligase
murE	771874		475		C>T	L>F	0.961		2.63e-06		6.52		UDP-N-acetylmuramoyl-L-alanyl-D-glutamate--L-lysine ligase
murE	771876		477		C>G	L>L	0.961		2.63e-06		6.52		UDP-N-acetylmuramoyl-L-alanyl-D-glutamate--L-lysine ligase
murE	771891		492		C>T	S>S	0.961		2.63e-06		6.52		UDP-N-acetylmuramoyl-L-alanyl-D-glutamate--L-lysine ligase
murE	771892		493		T>C	L>L	0.961		2.63e-06		6.52		UDP-N-acetylmuramoyl-L-alanyl-D-glutamate--L-lysine ligase
murE	771894		495		G>A	L>L	0.961		2.63e-06		6.52		UDP-N-acetylmuramoyl-L-alanyl-D-glutamate--L-lysine ligase
murE	771897		498		T>C	D>D	0.961		2.63e-06		6.52		UDP-N-acetylmuramoyl-L-alanyl-D-glutamate--L-lysine ligase
murE	771915		516		T>C	A>A	0.961		2.63e-06		6.52		UDP-N-acetylmuramoyl-L-alanyl-D-glutamate--L-lysine ligase
murE	771924		525		G>T	V>V	0.961		2.63e-06		6.52		UDP-N-acetylmuramoyl-L-alanyl-D-glutamate--L-lysine ligase
murE	771926		527		C>A	T>K	0.961		2.63e-06		6.52		UDP-N-acetylmuramoyl-L-alanyl-D-glutamate--L-lysine ligase
murE	771927		528		T>A	T>K	0.961		2.63e-06		6.52		UDP-N-acetylmuramoyl-L-alanyl-D-glutamate--L-lysine ligase
murE	771957		558		T>A	V>V	0.961		2.63e-06		6.52		UDP-N-acetylmuramoyl-L-alanyl-D-glutamate--L-lysine ligase
murE	771960		561		T>C	S>S	0.961		2.63e-06		6.52		UDP-N-acetylmuramoyl-L-alanyl-D-glutamate--L-lysine ligase
murE	771972		573		C>T	Y>Y	0.961		2.63e-06		6.52		UDP-N-acetylmuramoyl-L-alanyl-D-glutamate--L-lysine ligase
murE	771975		576		C>T	L>L	0.961		2.63e-06		6.52		UDP-N-acetylmuramoyl-L-alanyl-D-glutamate--L-lysine ligase
murE	771980		581		A>G	D>G	0.961		2.63e-06		6.52		UDP-N-acetylmuramoyl-L-alanyl-D-glutamate--L-lysine ligase
murE	771984		585		T>C	R>R	0.961		2.63e-06		6.52		UDP-N-acetylmuramoyl-L-alanyl-D-glutamate--L-lysine ligase
murF	773347		502		C>T	R>C	0.961		2.63e-06		6.52		UDP-N-acetylmuramoyl-tripeptide--D-alanyl-D-alanine ligase
murJ	776277		153		C>T	N>N	0.961		2.63e-06		6.52		Lipid II flippase MurJ
murJ	776340		216		C>T	L>L	0.961		2.63e-06		6.52		Lipid II flippase MurJ
murJ	776361		237		G>A	Q>Q	0.961		2.63e-06		6.52		Lipid II flippase MurJ
murJ	776364		240		T>C	V>V	0.961		2.63e-06		6.52		Lipid II flippase MurJ
murJ	776370		246		G>A	K>K	0.961		2.63e-06		6.52		Lipid II flippase MurJ
murJ	776379		255		C>T	S>S	0.961		2.63e-06		6.52		Lipid II flippase MurJ
murJ	776385		261		A>G	G>G	0.961		2.63e-06		6.52		Lipid II flippase MurJ
murJ	776388		264		A>G	Q>Q	0.961		2.63e-06		6.52		Lipid II flippase MurJ
murJ	776391		267		T>G	T>T	0.961		2.63e-06		6.52		Lipid II flippase MurJ
murJ	776403		279		T>C	Y>Y	0.961		2.63e-06		6.52		Lipid II flippase MurJ
murJ	776409		285		A>G	L>L	0.961		2.63e-06		6.52		Lipid II flippase MurJ
murJ	776412		288		C>T	I>I	0.961		2.63e-06		6.52		Lipid II flippase MurJ
murJ	776415		291		A>G	R>R	0.961		2.63e-06		6.52		Lipid II flippase MurJ
murJ	776418		294		T>C	S>S	0.961		2.63e-06		6.52		Lipid II flippase MurJ
murJ	776421		297		C>G	T>T	0.961		2.63e-06		6.52		Lipid II flippase MurJ
murJ	776422		298		C>T	L>L	0.961		2.63e-06		6.52		Lipid II flippase MurJ
murJ	776440		316		C>T	L>L	0.961		2.63e-06		6.52		Lipid II flippase MurJ
murJ	776445		321		C>T	G>G	0.961		2.63e-06		6.52		Lipid II flippase MurJ
murJ	776446		322		C>G	L>V	0.961		2.63e-06		6.52		Lipid II flippase MurJ
murJ	776449		325		A>G	I>V	0.961		2.63e-06		6.52		Lipid II flippase MurJ
murJ	776451		327		T>G	I>V	0.961		2.63e-06		6.52		Lipid II flippase MurJ
murJ	776457		333		A>G	S>S	0.961		2.63e-06		6.52		Lipid II flippase MurJ
murJ	776460		336		C>A	V>V	0.961		2.63e-06		6.52		Lipid II flippase MurJ
murJ	776472		348		G>A	L>L	0.961		2.63e-06		6.52		Lipid II flippase MurJ
murJ	776475		351		C>T	G>G	0.961		2.63e-06		6.52		Lipid II flippase MurJ
murJ	776481		357		T>C	P>P	0.961		2.63e-06		6.52		Lipid II flippase MurJ
murJ	776488		364		G>A	A>T	0.961		2.63e-06		6.52		Lipid II flippase MurJ
murJ	776490		366		G>C	A>A	0.961		2.63e-06		6.52		Lipid II flippase MurJ
murJ	776493		369		C>T	S>S	0.961		2.63e-06		6.52		Lipid II flippase MurJ
murJ	776505		381		T>G	G>G	0.961		2.63e-06		6.52		Lipid II flippase MurJ
murJ	776510		386		A>C	D>A	0.961		2.63e-06		6.52		Lipid II flippase MurJ
murJ	776511		387		C>T	D>A	0.961		2.63e-06		6.52		Lipid II flippase MurJ
murJ	776513		389		C>A	T>K	0.961		2.63e-06		6.52		Lipid II flippase MurJ
murJ	776514		390		A>G	T>K	0.961		2.63e-06		6.52		Lipid II flippase MurJ
murJ	776518		394		G>A	V>I	0.961		2.63e-06		6.52		Lipid II flippase MurJ
murJ	776523		399		C>A	P>P	0.961		2.63e-06		6.52		Lipid II flippase MurJ
murJ	776532		408		C>T	H>H	0.961		2.63e-06		6.52		Lipid II flippase MurJ
murJ	776535		411		C>T	S>S	0.961		2.63e-06		6.52		Lipid II flippase MurJ
murJ	776541		417		T>C	S>S	0.961		2.63e-06		6.52		Lipid II flippase MurJ
murJ	776544		420		A>G	L>L	0.961		2.63e-06		6.52		Lipid II flippase MurJ
murJ	776547		423		A>T	A>A	0.961		2.63e-06		6.52		Lipid II flippase MurJ
murJ	776550		426		T>C	V>V	0.961		2.63e-06		6.52		Lipid II flippase MurJ
murJ	776551		427		T>C	F>L	0.961		2.63e-06		6.52		Lipid II flippase MurJ
murJ	776554		430		A>G	I>V	0.961		2.63e-06		6.52		Lipid II flippase MurJ
murJ	776562		438		T>A	P>P	0.961		2.63e-06		6.52		Lipid II flippase MurJ
murJ	776565		441		A>C	V>V	0.961		2.63e-06		6.52		Lipid II flippase MurJ
murJ	776586		462		C>T	I>I	0.961		2.63e-06		6.52		Lipid II flippase MurJ
murJ	776592		468		A>G	Q>Q	0.961		2.63e-06		6.52		Lipid II flippase MurJ
murJ	776595		471		C>G	G>G	0.961		2.63e-06		6.52		Lipid II flippase MurJ
murJ	776604		480		T>C	N>N	0.961		2.63e-06		6.52		Lipid II flippase MurJ
murJ	776607		483		C>T	I>I	0.961		2.63e-06		6.52		Lipid II flippase MurJ
murJ	776613		489		T>C	P>P	0.961		2.63e-06		6.52		Lipid II flippase MurJ
murJ	776619		495		G>C	A>A	0.961		2.63e-06		6.52		Lipid II flippase MurJ
murJ	776641		517		C>T	L>L	0.961		2.63e-06		6.52		Lipid II flippase MurJ
murJ	776643		519		C>G	L>L	0.961		2.63e-06		6.52		Lipid II flippase MurJ
murJ	776649		525		G>A	R>R	0.961		2.63e-06		6.52		Lipid II flippase MurJ
murJ	776652		528		T>C	V>V	0.961		2.63e-06		6.52		Lipid II flippase MurJ
murJ	776655		531		C>T	I>I	0.961		2.63e-06		6.52		Lipid II flippase MurJ
murJ	776665		541		T>C	L>L	0.961		2.63e-06		6.52		Lipid II flippase MurJ
murJ	776775		651		G>T	G>G	0.961		2.63e-06		6.52		Lipid II flippase MurJ
murJ	776803		679		G>A	A>T	0.961		2.63e-06		6.52		Lipid II flippase MurJ
murJ	776832		708		T>C	T>T	0.961		2.63e-06		6.52		Lipid II flippase MurJ
murJ	776895		771		A>G	V>V	0.961		2.63e-06		6.52		Lipid II flippase MurJ
murJ	776904		780		T>C	S>S	0.961		2.63e-06		6.52		Lipid II flippase MurJ
murJ	776922		798		A>G	Q>Q	0.961		2.63e-06		6.52		Lipid II flippase MurJ
murJ	776931		807		T>C	D>D	0.961		2.63e-06		6.52		Lipid II flippase MurJ
murJ	776934		810		A>G	Q>Q	0.961		2.63e-06		6.52		Lipid II flippase MurJ
murJ	776938		814		A>T	T>S	0.961		2.63e-06		6.52		Lipid II flippase MurJ
murJ	776940		816		T>C	T>S	0.961		2.63e-06		6.52		Lipid II flippase MurJ
murJ	776946		822		C>G	V>V	0.961		2.63e-06		6.52		Lipid II flippase MurJ
murJ	776952		828		T>C	T>T	0.961		2.63e-06		6.52		Lipid II flippase MurJ
murJ	776957		833		C>G	T>S	0.961		2.63e-06		6.52		Lipid II flippase MurJ
murJ	776961		837		T>G	L>L	0.961		2.63e-06		6.52		Lipid II flippase MurJ
murJ	776979		855		T>C	R>R	0.961		2.63e-06		6.52		Lipid II flippase MurJ
murJ	776988		864		G>A	L>L	0.961		2.63e-06		6.52		Lipid II flippase MurJ
murJ	776989		865		C>T	L>L	0.961		2.63e-06		6.52		Lipid II flippase MurJ
murJ	776991		867		T>G	L>L	0.961		2.63e-06		6.52		Lipid II flippase MurJ
murJ	777006		882		C>T	Y>Y	0.961		2.63e-06		6.52		Lipid II flippase MurJ
murJ	777015		891		A>T	A>A	0.961		2.63e-06		6.52		Lipid II flippase MurJ
murJ	777018		894		C>T	N>N	0.961		2.63e-06		6.52		Lipid II flippase MurJ
murJ	777021		897		A>T	P>P	0.961		2.63e-06		6.52		Lipid II flippase MurJ
murJ	777024		900		C>T	A>A	0.961		2.63e-06		6.52		Lipid II flippase MurJ
murJ	777033		909		A>C	T>T	0.961		2.63e-06		6.52		Lipid II flippase MurJ
murJ	777045		921		T>C	I>I	0.961		2.63e-06		6.52		Lipid II flippase MurJ
murJ	777048		924		A>T	A>A	0.961		2.63e-06		6.52		Lipid II flippase MurJ
murJ	777057		933		A>T	A>A	0.961		2.63e-06		6.52		Lipid II flippase MurJ
murJ	777063		939		T>C	I>I	0.961		2.63e-06		6.52		Lipid II flippase MurJ
murJ	777066		942		T>A	G>G	0.961		2.63e-06		6.52		Lipid II flippase MurJ
murJ	777069		945		T>G	G>G	0.961		2.63e-06		6.52		Lipid II flippase MurJ
murJ	777072		948		A>T	V>V	0.961		2.63e-06		6.52		Lipid II flippase MurJ
murJ	777081		957		C>T	A>A	0.961		2.63e-06		6.52		Lipid II flippase MurJ
murJ	777087		963		A>G	L>L	0.961		2.63e-06		6.52		Lipid II flippase MurJ
murJ	777090		966		T>A	T>T	0.961		2.63e-06		6.52		Lipid II flippase MurJ
murJ	777553		1429		T>C	L>L	0.961		2.63e-06		6.52		Lipid II flippase MurJ
mutY	787053		200		G>A	R>H	0.961		2.63e-06		6.52		Adenine DNA glycosylase
nadC	791073		611		T>C	V>A	0.961		2.63e-06		6.52		Putative nicotinate-nucleotide pyrophosphorylase [carboxylating]
nadE	792327		359		A>T	E>V	0.961		2.63e-06		6.52		NH(3)-dependent NAD(+) synthetase
nikE	800548		225		A>G	V>V	0.961		2.63e-06		6.52		Nickel import system ATP-binding protein NikE
npr	801466		516		C>A	S>S	0.961		2.63e-06		6.52		NADH peroxidase
nrdE2	808981		1947		G>A	V>V	0.961		2.63e-06		6.52		Ribonucleoside-diphosphate reductase subunit alpha 2
nrdR	812089		211		G>A	V>I	0.961		2.63e-06		6.52		Transcriptional repressor NrdR
oadA_1	825211		180		C>T	N>N	0.961		2.63e-06		6.52		Oxaloacetate decarboxylase alpha chain
oadA_2	826811		364		C>T	P>S	0.961		2.63e-06		6.52		Oxaloacetate decarboxylase alpha chain
obg	830915		1287		C>T	G>G	0.961		2.63e-06		6.52		GTPase Obg
opuAA	834206		336		C>T	F>F	0.961		2.63e-06		6.52		Glycine betaine transport ATP-binding protein OpuAA
opuAA	834275		405		C>T	G>G	0.961		2.63e-06		6.52		Glycine betaine transport ATP-binding protein OpuAA
opuAA	834539		669		T>C	H>H	0.961		2.63e-06		6.52		Glycine betaine transport ATP-binding protein OpuAA
opuAA	834989		1119		T>C	N>N	0.961		2.63e-06		6.52		Glycine betaine transport ATP-binding protein OpuAA
pnp	892008		661		G>A	V>I	0.961		2.63e-06		6.52		Polyribonucleotide nucleotidyltransferase
pnp	892487		1140		G>A	L>L	0.961		2.63e-06		6.52		Polyribonucleotide nucleotidyltransferase
pnp	892490		1143		T>C	H>H	0.961		2.63e-06		6.52		Polyribonucleotide nucleotidyltransferase
polA	895573		2093		C>T	A>V	0.961		2.63e-06		6.52		DNA polymerase I
potB	904217		375		C>T	T>T	0.961		2.63e-06		6.52		Spermidine/putrescine transport system permease protein PotB
ppc	909167		2520		T>C	A>A	0.961		2.63e-06		6.52		Phosphoenolpyruvate carboxylase
prfC	913080		844		G>A	A>T	0.961		2.63e-06		6.52		Peptide chain release factor 3
prfC	913212		976		G>A	G>S	0.961		2.63e-06		6.52		Peptide chain release factor 3
proB	919655		444		G>T	E>D	0.961		2.63e-06		6.52		Glutamate 5-kinase 1
proB	919664		453		C>T	H>H	0.961		2.63e-06		6.52		Glutamate 5-kinase 1
proB	919879		668		A>G	M>R	0.961		2.63e-06		6.52		Glutamate 5-kinase 1
proB	919922		711		T>G	K>K	0.961		2.63e-06		6.52		Glutamate 5-kinase 1
proS	921270		358		G>A	D>N	0.961		2.63e-06		6.52		Proline--tRNA ligase
proS	921374		462		G>A	E>E	0.961		2.63e-06		6.52		Proline--tRNA ligase
proS	921702		790		G>A	E>K	0.961		2.63e-06		6.52		Proline--tRNA ligase
proS	921746		834		C>T	Y>Y	0.961		2.63e-06		6.52		Proline--tRNA ligase
prs2	923738		6		T>C	T>T	0.961		2.63e-06		6.52		Putative ribose-phosphate pyrophosphokinase 2
prsA_2	925901		126		C>T	V>V	0.961		2.63e-06		6.52		Foldase protein PrsA
ptcA	932026		325		G>T	G>C	0.961		2.63e-06		6.52		PTS system galactose-specific EIIA component
ptsI	935487		384		T>C	R>R	0.961		2.63e-06		6.52		Phosphoenolpyruvate-protein phosphotransferase
pucK	937958		1121		C>T	A>V	0.961		2.63e-06		6.52		Uric acid permease PucK
punA	938283		162		C>T	G>G	0.961		2.63e-06		6.52		Purine nucleoside phosphorylase 1
purC	941808		291		A>G	P>P	0.961		2.63e-06		6.52		Phosphoribosylaminoimidazole-succinocarboxamide synthase
purM	947299		547		C>T	L>F	0.961		2.63e-06		6.52		Phosphoribosylformylglycinamidine cyclo-ligase
pyrDA	953190		792		C>A	A>A	0.961		2.63e-06		6.52		Putative dihydroorotate dehydrogenase A (fumarate)
pyrDA	953208		810		T>A	G>G	0.961		2.63e-06		6.52		Putative dihydroorotate dehydrogenase A (fumarate)
pyrG	954063		36		A>G	V>V	0.961		2.63e-06		6.52		CTP synthase
pyrP	956371		10		G>A	V>I	0.961		2.63e-06		6.52		Uracil permease
queA	959010		867		G>C	K>N	0.961		2.63e-06		6.52		S-adenosylmethionine:tRNA ribosyltransferase-isomerase
rasP	967491		198		G>A	V>V	0.961		2.63e-06		6.52		Regulator of sigma-W protease RasP
rasP	968119		826		G>A	A>T	0.961		2.63e-06		6.52		Regulator of sigma-W protease RasP
rbsR_2	970372		619		A>C	I>L	0.961		2.63e-06		6.52		Ribose operon repressor
rbsR_2	970485		732		C>T	L>L	0.961		2.63e-06		6.52		Ribose operon repressor
recA	973584		129		A>G	G>G	0.961		2.63e-06		6.52		Protein RecA
recR	983167		558		A>G	V>V	0.961		2.63e-06		6.52		Recombination protein RecR
relA	986116		870		T>C	R>R	0.961		2.63e-06		6.52		Bifunctional (p)ppGpp synthase/hydrolase RelA
rexB	991798		3063		C>T	S>S	0.961		2.63e-06		6.52		ATP-dependent helicase/deoxyribonuclease subunit B
rfbC	993289		468		T>G	F>L	0.961		2.63e-06		6.52		Protein RmlC
rhaR_1	994747		1332		C>T	Y>Y	0.961		2.63e-06		6.52		HTH-type transcriptional activator RhaR
rmlD	1006430		498		G>A	E>E	0.961		2.63e-06		6.52		dTDP-4-dehydrorhamnose reductase
rmlD	1006754		822		G>A	L>L	0.961		2.63e-06		6.52		dTDP-4-dehydrorhamnose reductase
rnmV	1012817		297		C>A	S>S	0.961		2.63e-06		6.52		Ribonuclease M5
rnr	1014567		1117		C>A	V>I	0.961		2.63e-06		6.52		Ribonuclease R
rnr	1015583		2133		C>T	K>N	0.961		2.63e-06		6.52		Ribonuclease R
rnz	1017515		123		A>G	G>G	0.961		2.63e-06		6.52		Ribonuclease Z
rpe	1018745		423		C>T	N>N	0.961		2.63e-06		6.52		Ribulose-phosphate 3-epimerase
rpiA	1019099		114		C>T	G>G	0.961		2.63e-06		6.52		Ribose-5-phosphate isomerase A
rplA	1021100		600		A>G	K>K	0.961		2.63e-06		6.52		50S ribosomal protein L1
rsfS	1053127		95		C>T	A>V	0.961		2.63e-06		6.52		Ribosomal silencing factor RsfS
rsmA	1054589		306		A>G	L>L	0.961		2.63e-06		6.52		Ribosomal RNA small subunit methyltransferase A
rsmA	1054640		357		C>T	P>P	0.961		2.63e-06		6.52		Ribosomal RNA small subunit methyltransferase A
rsmA	1054811		528		G>A	V>V	0.961		2.63e-06		6.52		Ribosomal RNA small subunit methyltransferase A
rsmA	1054853		570		C>T	R>R	0.961		2.63e-06		6.52		Ribosomal RNA small subunit methyltransferase A
rsmA	1054976		693		C>T	V>V	0.961		2.63e-06		6.52		Ribosomal RNA small subunit methyltransferase A
rutB	1062518		78		T>C	A>A	0.961		2.63e-06		6.52		Peroxyureidoacrylate/ureidoacrylate amidohydrolase RutB
rutB	1062636		196		C>T	L>L	0.961		2.63e-06		6.52		Peroxyureidoacrylate/ureidoacrylate amidohydrolase RutB
ruvA	1063544		549		G>A	T>T	0.961		2.63e-06		6.52		Holliday junction ATP-dependent DNA helicase RuvA
scrB	1072337		823		G>A	G>R	0.961		2.63e-06		6.52		Sucrose-6-phosphate hydrolase
scrB	1072766		1252		G>A	V>M	0.961		2.63e-06		6.52		Sucrose-6-phosphate hydrolase
sigA	1082344		468		A>G	Q>Q	0.961		2.63e-06		6.52		RNA polymerase sigma factor SigA
smc_1	1084767		1247		A>C	K>T	0.961		2.63e-06		6.52		Chromosome partition protein Smc
smpB	1089694		12		T>G	G>G	0.961		2.63e-06		6.52		SsrA-binding protein
sstT	1099200		362		C>T	A>V	0.961		2.63e-06		6.52		Serine/threonine transporter SstT
thiN	1117394		148		T>C	S>P	0.961		2.63e-06		6.52		Thiamine pyrophosphokinase
thiN	1117558		312		C>T	H>H	0.961		2.63e-06		6.52		Thiamine pyrophosphokinase
thlA_2	1121008		273		A>G	G>G	0.961		2.63e-06		6.52		Acetyl-CoA acetyltransferase
thrS	1123120		1197		T>A	R>R	0.961		2.63e-06		6.52		Threonine--tRNA ligase
thrS	1123189		1266		C>T	Y>Y	0.961		2.63e-06		6.52		Threonine--tRNA ligase
trmB	1138494		593		C>T	S>F	0.961		2.63e-06		6.52		tRNA (guanine-N(7)-)-methyltransferase
ulaG	1162707		822		T>A	L>L	0.961		2.63e-06		6.52		Putative L-ascorbate-6-phosphate lactonase UlaG
upp	1164149		518		C>T	A>V	0.961		2.63e-06		6.52		Uracil phosphoribosyltransferase
uvrC	1171299		627		T>G	A>A	0.961		2.63e-06		6.52		UvrABC system protein C
walK	1175649		528		C>T	R>R	0.961		2.63e-06		6.52		Sensor histidine kinase WalK
walR	1176846		372		G>T	T>T	0.961		2.63e-06		6.52		Transcriptional regulatory protein WalR
whiA	1177499		314		G>A	G>D	0.961		2.63e-06		6.52		Putative cell division protein WhiA
ydcV	1194570		189		T>C	V>V	0.961		2.63e-06		6.52		Inner membrane ABC transporter permease protein YdcV
fhuB	1201536		892		C>T	L>F	0.961		2.63e-06		6.52		Putative siderophore transport system permease protein YfiZ
ykoD	1222087		707		G>A	R>Q	0.961		2.63e-06		6.52		Putative HMP/thiamine import ATP-binding protein YkoD
ykoD	1222520		1140		G>A	T>T	0.961		2.63e-06		6.52		Putative HMP/thiamine import ATP-binding protein YkoD
yvgN	1234118		840		A>G	*>*	0.961		2.63e-06		6.52		Glyoxal reductase
znuA	1236355		32		T>C	V>A	0.961		2.63e-06		6.52		High-affinity zinc uptake system binding-protein ZnuA
znuA	1236788		465		T>C	V>V	0.961		2.63e-06		6.52		High-affinity zinc uptake system binding-protein ZnuA
znuC	1238386		326		A>G	H>R	0.961		2.63e-06		6.52		High-affinity zinc uptake system ATP-binding protein ZnuC
argR_1	44947		364		A>G	I>V	0.0181		3.12e-06		-10.2		Arginine regulator
tgt	1115964		1076		A>G	N>S	0.36		3.25e-06		-0.805		Queuine tRNA-ribosyltransferase
glpK	273121		1360		A>C	Y>H	0.961		3.81e-06		6.31		Glycerol kinase
nrdE2	807050		16		C>A	L>I	0.961		4.25e-06		6.27		Ribonucleoside-diphosphate reductase subunit alpha 2
nrdE2	807580		546		C>T	N>N	0.961		4.25e-06		6.27		Ribonucleoside-diphosphate reductase subunit alpha 2
nrdE2	807595		561		T>C	S>S	0.961		4.25e-06		6.27		Ribonucleoside-diphosphate reductase subunit alpha 2
nrdE2	807598		564		C>T	I>I	0.961		4.25e-06		6.27		Ribonucleoside-diphosphate reductase subunit alpha 2
nrdE2	807607		573		T>C	A>A	0.961		4.25e-06		6.27		Ribonucleoside-diphosphate reductase subunit alpha 2
naiP	796922		598		G>A	E>K	0.154		6.79e-06		-0.999		Putative niacin/nicotinamide transporter NaiP
cutC_1	135069		49		A>G	T>A	0.962		8.4e-06		6.46		Choline trimethylamine-lyase
exoA	200764		405		C>T	G>G	0.962		8.4e-06		6.46		Exodeoxyribonuclease
exoA	200767		408		T>A	L>L	0.962		8.4e-06		6.46		Exodeoxyribonuclease
fus	243663		1311		T>C	R>R	0.962		8.4e-06		6.46		Elongation factor G
fus	243945		1593		G>A	V>V	0.962		8.4e-06		6.46		Elongation factor G
fus	244014		1662		T>A	A>A	0.962		8.4e-06		6.46		Elongation factor G
fus	244032		1680		C>T	D>D	0.962		8.4e-06		6.46		Elongation factor G
fus	244044		1692		A>G	K>K	0.962		8.4e-06		6.46		Elongation factor G
fus	244107		1755		T>A	S>S	0.962		8.4e-06		6.46		Elongation factor G
fus	244113		1761		T>A	A>A	0.962		8.4e-06		6.46		Elongation factor G
fus	244134		1782		A>T	S>S	0.962		8.4e-06		6.46		Elongation factor G
gatC_1	250521		135		T>C	D>D	0.962		8.4e-06		6.46		Glutamyl-tRNA(Gln) amidotransferase subunit C
gatC_1	250582		196		G>A	V>I	0.962		8.4e-06		6.46		Glutamyl-tRNA(Gln) amidotransferase subunit C
gatC_1	250584		198		C>T	V>V	0.962		8.4e-06		6.46		Glutamyl-tRNA(Gln) amidotransferase subunit C
gatC_1	250590		204		A>G	E>E	0.962		8.4e-06		6.46		Glutamyl-tRNA(Gln) amidotransferase subunit C
group_641	587015		213		G>T	L>L	0.962		8.4e-06		6.46		Hypothetical protein
gsiC	617752		207		A>G	Q>Q	0.962		8.4e-06		6.46		Glutathione transport system permease protein GsiC
leuS	691454		816		G>A	T>T	0.962		8.4e-06		6.46		Leucine--tRNA ligase
licR_2	699001		648		T>C	S>S	0.962		8.4e-06		6.46		Putative licABCH operon regulator
addA	11481		1137		T>C	S>S	0.962		9.7e-06		6.24		ATP-dependent helicase/nuclease subunit A
addA	11854		1510		G>A	D>N	0.962		9.7e-06		6.24		ATP-dependent helicase/nuclease subunit A
addA	12621		2277		A>G	L>L	0.962		9.7e-06		6.24		ATP-dependent helicase/nuclease subunit A
addA	12942		2598		G>A	L>L	0.962		9.7e-06		6.24		ATP-dependent helicase/nuclease subunit A
addA	13227		2883		A>G	Q>Q	0.962		9.7e-06		6.24		ATP-dependent helicase/nuclease subunit A
addA	13229		2885		C>T	A>V	0.962		9.7e-06		6.24		ATP-dependent helicase/nuclease subunit A
addA	13246		2902		C>G	P>A	0.962		9.7e-06		6.24		ATP-dependent helicase/nuclease subunit A
addA	13824		3480		A>C	T>T	0.962		9.7e-06		6.24		ATP-dependent helicase/nuclease subunit A
alaS	30546		1677		T>G	R>R	0.962		9.7e-06		6.24		Alanine--tRNA ligase
atpC	66375		237		C>T	T>T	0.962		9.7e-06		6.24		ATP synthase epsilon chain
atpD	66603		48		T>C	V>V	0.962		9.7e-06		6.24		ATP synthase subunit beta
atpD	67233		678		C>A	A>A	0.962		9.7e-06		6.24		ATP synthase subunit beta
brnQ	86367		1104		C>T	V>V	0.962		9.7e-06		6.24		Branched-chain amino acid transport system 2 carrier protein
citD	103096		30		T>G	G>G	0.962		9.7e-06		6.24		Citrate lyase acyl carrier protein
citD	103249		183		T>C	A>A	0.962		9.7e-06		6.24		Citrate lyase acyl carrier protein
dltA	164373		86		G>T	R>L	0.962		9.7e-06		6.24		D-alanine--D-alanyl carrier protein ligase
dnaG	174149		319		C>T	P>S	0.962		9.7e-06		6.24		DNA primase
dnaG	174152		322		C>T	P>S	0.962		9.7e-06		6.24		DNA primase
ecfT_2	190813		360		A>C	L>L	0.962		9.7e-06		6.24		Energy-coupling factor transporter transmembrane protein EcfT
eriC	197399		181		C>T	L>L	0.962		9.7e-06		6.24		Chloride/fluoride channel protein
eriC	197428		210		C>T	Y>Y	0.962		9.7e-06		6.24		Chloride/fluoride channel protein
eriC	197644		426		A>T	E>D	0.962		9.7e-06		6.24		Chloride/fluoride channel protein
eriC	198373		1155		G>A	S>S	0.962		9.7e-06		6.24		Chloride/fluoride channel protein
ezrA	201841		654		G>A	E>E	0.962		9.7e-06		6.24		Septation ring formation regulator EzrA
ezrA	202852		1665		T>C	P>P	0.962		9.7e-06		6.24		Septation ring formation regulator EzrA
group_1008	294245		621		C>A	A>A	0.962		9.7e-06		6.24		Hypothetical protein
group_1008	294338		714		A>G	L>L	0.962		9.7e-06		6.24		Hypothetical protein
group_1008	294341		717		G>T	A>A	0.962		9.7e-06		6.24		Hypothetical protein
group_1008	294345		721		C>A	Q>K	0.962		9.7e-06		6.24		Hypothetical protein
group_1008	294347		723		G>A	Q>K	0.962		9.7e-06		6.24		Hypothetical protein
group_1008	294353		729		T>C	G>G	0.962		9.7e-06		6.24		Hypothetical protein
group_1008	294357		733		A>G	T>A	0.962		9.7e-06		6.24		Hypothetical protein
group_1008	294359		735		T>C	T>A	0.962		9.7e-06		6.24		Hypothetical protein
group_1008	294365		741		C>T	D>D	0.962		9.7e-06		6.24		Hypothetical protein
group_1008	294368		744		G>A	K>K	0.962		9.7e-06		6.24		Hypothetical protein
group_1008	294369		745		A>T	T>S	0.962		9.7e-06		6.24		Hypothetical protein
group_1008	294374		750		T>C	S>S	0.962		9.7e-06		6.24		Hypothetical protein
group_1008	294383		759		C>T	Y>Y	0.962		9.7e-06		6.24		Hypothetical protein
group_1008	294388		764		A>G	K>R	0.962		9.7e-06		6.24		Hypothetical protein
group_1008	294389		765		A>G	K>R	0.962		9.7e-06		6.24		Hypothetical protein
group_1008	294390		766		C>G	L>V	0.962		9.7e-06		6.24		Hypothetical protein
group_1008	294398		774		T>C	P>P	0.962		9.7e-06		6.24		Hypothetical protein
group_1008	294416		792		A>G	L>L	0.962		9.7e-06		6.24		Hypothetical protein
group_1008	294417		793		G>A	V>I	0.962		9.7e-06		6.24		Hypothetical protein
group_1008	294419		795		G>T	V>I	0.962		9.7e-06		6.24		Hypothetical protein
group_1008	294422		798		A>T	G>G	0.962		9.7e-06		6.24		Hypothetical protein
group_1008	294425		801		G>T	V>V	0.962		9.7e-06		6.24		Hypothetical protein
group_1008	294428		804		G>T	A>A	0.962		9.7e-06		6.24		Hypothetical protein
group_1008	294431		807		A>C	S>S	0.962		9.7e-06		6.24		Hypothetical protein
group_1008	294432		808		C>T	L>L	0.962		9.7e-06		6.24		Hypothetical protein
group_1008	294437		813		T>C	D>D	0.962		9.7e-06		6.24		Hypothetical protein
group_1008	294440		816		G>A	Q>Q	0.962		9.7e-06		6.24		Hypothetical protein
group_1008	294449		825		G>A	R>R	0.962		9.7e-06		6.24		Hypothetical protein
group_1008	294452		828		G>A	V>V	0.962		9.7e-06		6.24		Hypothetical protein
group_1008	294455		831		G>A	Q>Q	0.962		9.7e-06		6.24		Hypothetical protein
group_1008	294458		834		C>T	R>R	0.962		9.7e-06		6.24		Hypothetical protein
group_1008	294974		1350		A>C	E>D	0.962		9.7e-06		6.24		Hypothetical protein
group_1008	294977		1353		G>T	V>V	0.962		9.7e-06		6.24		Hypothetical protein
group_1008	295097		1473		G>T	T>T	0.962		9.7e-06		6.24		Hypothetical protein
group_1008	295325		1701		A>G	E>E	0.962		9.7e-06		6.24		Hypothetical protein
group_1024	298110		241		C>A	Q>K	0.962		9.7e-06		6.24		Hypothetical protein
group_1061	304326		1425		C>T	D>D	0.962		9.7e-06		6.24		Putative ABC transporter ATP-binding/permease protein
group_1082	311788		171		G>T	R>R	0.962		9.7e-06		6.24		Putative bifunctional phosphatase/peptidyl-prolyl cis-trans isomerase
group_1423	349383		328		C>T	A>S	0.962		9.7e-06		6.24		Hypothetical protein
group_1665	403473		698		C>T	P>L	0.962		9.7e-06		6.24		Hypothetical protein
group_4286	474358		522		G>A	G>G	0.962		9.7e-06		6.24		Hypothetical protein
group_4286	474544		708		C>T	D>D	0.962		9.7e-06		6.24		Hypothetical protein
group_4286	474604		768		G>A	K>K	0.962		9.7e-06		6.24		Hypothetical protein
group_4286	474685		849		C>T	G>G	0.962		9.7e-06		6.24		Hypothetical protein
group_4445	501344		346		T>G	*>E	0.962		9.7e-06		6.24		Putative protein
group_445	501567		224		A>G	H>R	0.962		9.7e-06		6.24		Hypothetical protein
group_445	501905		562		T>G	S>A	0.962		9.7e-06		6.24		Hypothetical protein
group_4461	503248		294		C>T	G>G	0.962		9.7e-06		6.24		Alpha-monoglucosyldiacylglycerol synthase
group_4473	505234		150		C>G	A>A	0.962		9.7e-06		6.24		Hypothetical protein
group_4504	510817		819		C>G	D>E	0.962		9.7e-06		6.24		Hypothetical protein
group_4664	543793		1074		C>T	A>A	0.962		9.7e-06		6.24		Putative dipeptidase
group_4664	543954		1235		T>C	V>A	0.962		9.7e-06		6.24		Putative dipeptidase
group_531	563164		99		C>T	N>N	0.962		9.7e-06		6.24		Hypothetical protein
group_531	563337		272		A>G	E>G	0.962		9.7e-06		6.24		Hypothetical protein
group_531	564058		993		C>T	G>G	0.962		9.7e-06		6.24		Hypothetical protein
ktrA	669503		330		T>G	V>V	0.962		9.7e-06		6.24		Ktr system potassium uptake protein A
ktrA	669572		399		T>C	N>N	0.962		9.7e-06		6.24		Ktr system potassium uptake protein A
ktrA	669575		402		G>T	L>L	0.962		9.7e-06		6.24		Ktr system potassium uptake protein A
ktrA	669576		403		T>C	L>L	0.962		9.7e-06		6.24		Ktr system potassium uptake protein A
ktrA	669578		405		A>C	L>L	0.962		9.7e-06		6.24		Ktr system potassium uptake protein A
ktrA	669584		411		T>A	R>R	0.962		9.7e-06		6.24		Ktr system potassium uptake protein A
ligA	702793		1950		C>A	R>R	0.962		9.7e-06		6.24		DNA ligase
ligA	702794		1951		C>A	Q>K	0.962		9.7e-06		6.24		DNA ligase
metP	735586		306		A>G	G>G	0.962		9.7e-06		6.24		Methionine import system permease protein MetP
mltF_1	739933		617		G>A	S>N	0.962		9.7e-06		6.24		Membrane-bound lytic murein transglycosylase F
mltF_1	740693		1377		T>C	T>T	0.962		9.7e-06		6.24		Membrane-bound lytic murein transglycosylase F
mscL	756971		165		C>T	N>N	0.962		9.7e-06		6.24		Large-conductance mechanosensitive channel
mscL	757111		305		C>T	A>V	0.962		9.7e-06		6.24		Large-conductance mechanosensitive channel
mtgA_1	762093		732		T>C	S>S	0.962		9.7e-06		6.24		Biosynthetic peptidoglycan transglycosylase
nanA	797900		355		G>T	A>S	0.962		9.7e-06		6.24		N-acetylneuraminate lyase
nanA	797929		384		T>G	S>S	0.962		9.7e-06		6.24		N-acetylneuraminate lyase
nanA	797930		385		T>G	S>E	0.962		9.7e-06		6.24		N-acetylneuraminate lyase
nanA	797931		386		C>A	S>E	0.962		9.7e-06		6.24		N-acetylneuraminate lyase
nanA	797935		390		T>A	A>A	0.962		9.7e-06		6.24		N-acetylneuraminate lyase
nanA	798040		495		C>G	G>G	0.962		9.7e-06		6.24		N-acetylneuraminate lyase
nanA	798049		504		T>C	N>N	0.962		9.7e-06		6.24		N-acetylneuraminate lyase
nanA	798124		579		A>G	P>P	0.962		9.7e-06		6.24		N-acetylneuraminate lyase
nrnA	812595		222		T>C	Y>Y	0.962		9.7e-06		6.24		Putative bifunctional oligoribonuclease and PAP phosphatase NrnA
nrnA	812805		432		G>A	K>K	0.962		9.7e-06		6.24		Putative bifunctional oligoribonuclease and PAP phosphatase NrnA
pepQ	862778		624		C>T	N>N	0.962		9.7e-06		6.24		Xaa-Pro dipeptidase
pheS	882303		355		C>T	L>L	0.962		9.7e-06		6.24		Phenylalanine--tRNA ligase alpha subunit
pheS	882654		706		A>G	K>E	0.962		9.7e-06		6.24		Phenylalanine--tRNA ligase alpha subunit
pheT	883079		54		A>G	P>P	0.962		9.7e-06		6.24		Phenylalanine--tRNA ligase beta subunit
pheT	884482		1457		C>T	A>V	0.962		9.7e-06		6.24		Phenylalanine--tRNA ligase beta subunit
pheT	884700		1675		T>C	L>L	0.962		9.7e-06		6.24		Phenylalanine--tRNA ligase beta subunit
pheT	884796		1771		G>A	D>N	0.962		9.7e-06		6.24		Phenylalanine--tRNA ligase beta subunit
pheT	885093		2068		G>A	D>N	0.962		9.7e-06		6.24		Phenylalanine--tRNA ligase beta subunit
pheT	885101		2076		T>G	A>A	0.962		9.7e-06		6.24		Phenylalanine--tRNA ligase beta subunit
pheT	885120		2095		C>T	P>S	0.962		9.7e-06		6.24		Phenylalanine--tRNA ligase beta subunit
pheT	885139		2114		C>T	A>V	0.962		9.7e-06		6.24		Phenylalanine--tRNA ligase beta subunit
pheT	885143		2118		A>G	E>E	0.962		9.7e-06		6.24		Phenylalanine--tRNA ligase beta subunit
pheT	885146		2121		C>T	I>I	0.962		9.7e-06		6.24		Phenylalanine--tRNA ligase beta subunit
pheT	885149		2124		A>C	T>T	0.962		9.7e-06		6.24		Phenylalanine--tRNA ligase beta subunit
pheT	885396		2371		G>T	A>S	0.962		9.7e-06		6.24		Phenylalanine--tRNA ligase beta subunit
ppm1	910124		678		A>G	R>R	0.962		9.7e-06		6.24		Polyprenol monophosphomannose synthase
rexB	988915		180		C>T	V>V	0.962		9.7e-06		6.24		ATP-dependent helicase/deoxyribonuclease subunit B
rexB	989470		735		A>G	Q>Q	0.962		9.7e-06		6.24		ATP-dependent helicase/deoxyribonuclease subunit B
rexB	989872		1137		T>C	Y>Y	0.962		9.7e-06		6.24		ATP-dependent helicase/deoxyribonuclease subunit B
rexB	990875		2140		C>T	L>L	0.962		9.7e-06		6.24		ATP-dependent helicase/deoxyribonuclease subunit B
rmlB	1004912		21		A>G	V>V	0.962		9.7e-06		6.24		dTDP-glucose 4
rsmA	1054643		360		T>C	I>I	0.962		9.7e-06		6.24		Ribosomal RNA small subunit methyltransferase A
tcyA_2	1111915		183		C>G	G>G	0.962		9.7e-06		6.24		L-cystine-binding protein TcyA
tcyA_2	1112206		474		G>A	Q>Q	0.962		9.7e-06		6.24		L-cystine-binding protein TcyA
thrS	1122202		279		T>A	G>G	0.962		9.7e-06		6.24		Threonine--tRNA ligase
thrS	1122250		327		T>A	A>A	0.962		9.7e-06		6.24		Threonine--tRNA ligase
thrS	1123675		1752		G>A	Q>Q	0.962		9.7e-06		6.24		Threonine--tRNA ligase
tkt	1127092		1077		A>G	Q>Q	0.962		9.7e-06		6.24		Transketolase
tkt	1127098		1083		C>T	A>A	0.962		9.7e-06		6.24		Transketolase
tmcAL	1129034		205		G>A	V>I	0.962		9.7e-06		6.24		tRNA(Met) cytidine acetate ligase
tmcAL	1129532		703		C>T	L>L	0.962		9.7e-06		6.24		tRNA(Met) cytidine acetate ligase
tmcAL	1129537		708		C>T	N>N	0.962		9.7e-06		6.24		tRNA(Met) cytidine acetate ligase
tmcAL	1129582		753		A>G	A>A	0.962		9.7e-06		6.24		tRNA(Met) cytidine acetate ligase
trmB	1138021		120		T>C	P>P	0.962		9.7e-06		6.24		tRNA (guanine-N(7)-)-methyltransferase
trxA	1145464		103		G>A	A>T	0.962		9.7e-06		6.24		Thioredoxin
dut	187699		177		C>T	G>G	0.0166		1.11e-05		-8.09		Deoxyuridine 5'-triphosphate nucleotidohydrolase
group_1418	348317		1632		C>T	L>L	0.0166		1.11e-05		-8.09		Hypothetical protein
group_1418	348320		1635		T>C	F>F	0.0166		1.11e-05		-8.09		Hypothetical protein
hmo	634922		357		T>C	A>A	0.0166		1.11e-05		-8.09		4-hydroxymandelate oxidase
murI	775837		508		G>T	A>S	0.152		1.33e-05		-0.958		Glutamate racemase
manZ_1	720404		322		C>T	L>L	0.0181		1.45e-05		-9.06		PTS system mannose-specific EIID component
mnmE	748536		79		T>C	L>L	0.0181		1.45e-05		-9.06		tRNA modification GTPase MnmE
hpf	637217		225		T>C	Y>Y	0.0301		1.51e-05		-8.42		Ribosome hibernation promotion factor
pepF1_1	855864		1750		A>G	K>E	0.0301		1.51e-05		-8.42		Oligoendopeptidase F
group_4445	501280		282		T>C	S>S	0.0196		1.59e-05		-7.34		Putative protein
group_900	605685		186		T>C	A>A	0.0196		1.59e-05		-7.34		Hypothetical protein
lepA	689486		681		A>G	K>K	0.0196		1.59e-05		-7.34		Elongation factor 4
accC	4698		612		C>T	Y>Y	0.964		1.69e-05		4.98		Biotin carboxylase
dexB	155187		512		C>A	A>D	0.964		1.69e-05		4.98		Glucan 1
group_1392	341919		394		A>C	K>Q	0.964		1.69e-05		4.98		Hypothetical protein
group_1392	342161		636		A>T	E>D	0.964		1.69e-05		4.98		Hypothetical protein
group_4423	494254		432		T>C	S>S	0.964		1.69e-05		4.98		Hypothetical protein
group_4504	512166		2168		C>A	A>D	0.964		1.69e-05		4.98		Hypothetical protein
group_4668	544168		117		A>T	G>G	0.964		1.69e-05		4.98		Hypothetical protein
gsiC	617968		423		T>A	S>S	0.964		1.69e-05		4.98		Glutathione transport system permease protein GsiC
gsiC	618004		459		C>A	G>G	0.964		1.69e-05		4.98		Glutathione transport system permease protein GsiC
hmo	634845		280		C>T	H>Y	0.964		1.69e-05		4.98		4-hydroxymandelate oxidase
lepA	690413		1608		G>T	V>V	0.964		1.69e-05		4.98		Elongation factor 4
manZ_1	720385		303		C>T	I>I	0.964		1.69e-05		4.98		PTS system mannose-specific EIID component
manZ_1	720388		306		C>G	T>T	0.964		1.69e-05		4.98		PTS system mannose-specific EIID component
manZ_1	720391		309		T>G	A>A	0.964		1.69e-05		4.98		PTS system mannose-specific EIID component
manZ_1	720394		312		T>A	V>V	0.964		1.69e-05		4.98		PTS system mannose-specific EIID component
manZ_1	720397		315		G>A	K>K	0.964		1.69e-05		4.98		PTS system mannose-specific EIID component
manZ_1	720400		318		T>A	A>A	0.964		1.69e-05		4.98		PTS system mannose-specific EIID component
manZ_1	720403		321		G>T	S>S	0.964		1.69e-05		4.98		PTS system mannose-specific EIID component
manZ_1	720406		324		G>A	L>L	0.964		1.69e-05		4.98		PTS system mannose-specific EIID component
manZ_1	720421		339		T>C	S>S	0.964		1.69e-05		4.98		PTS system mannose-specific EIID component
msmX	757688		519		C>T	S>S	0.964		1.69e-05		4.98		Oligosaccharides import ATP-binding protein MsmX
pnp	891857		510		G>A	A>A	0.964		1.69e-05		4.98		Polyribonucleotide nucleotidyltransferase
proS	921236		324		G>A	P>P	0.964		1.69e-05		4.98		Proline--tRNA ligase
proS	921239		327		C>T	T>T	0.964		1.69e-05		4.98		Proline--tRNA ligase
rbsR_2	970191		438		G>A	L>L	0.964		1.69e-05		4.98		Ribose operon repressor
rhaR_1	994000		585		C>T	Y>Y	0.964		1.69e-05		4.98		HTH-type transcriptional activator RhaR
rhaR_1	994069		654		A>G	A>A	0.964		1.69e-05		4.98		HTH-type transcriptional activator RhaR
rnz	1017590		198		G>A	G>G	0.964		1.69e-05		4.98		Ribonuclease Z
rsmA	1054763		480		C>T	I>I	0.964		1.69e-05		4.98		Ribosomal RNA small subunit methyltransferase A
rsmA	1054766		483		G>T	S>S	0.964		1.69e-05		4.98		Ribosomal RNA small subunit methyltransferase A
rsmA	1054769		486		T>G	A>A	0.964		1.69e-05		4.98		Ribosomal RNA small subunit methyltransferase A
rutB	1062708		268		C>T	H>Y	0.964		1.69e-05		4.98		Peroxyureidoacrylate/ureidoacrylate amidohydrolase RutB
scrB	1071844		330		C>A	A>A	0.964		1.69e-05		4.98		Sucrose-6-phosphate hydrolase
scrB	1072336		822		G>A	G>G	0.964		1.69e-05		4.98		Sucrose-6-phosphate hydrolase
yknY_1	1217699		144		C>T	G>G	0.964		1.69e-05		4.98		Putative ABC transporter ATP-binding protein YknY
yknY_1	1217744		189		G>T	R>R	0.964		1.69e-05		4.98		Putative ABC transporter ATP-binding protein YknY
lnrL_2	705373		810		G>A	M>I	0.148		1.82e-05		-0.952		Linearmycin resistance ATP-binding protein LnrL
mvaA	788673		665		G>A	S>N	0.148		1.82e-05		-0.952		3-hydroxy-3-methylglutaryl-coenzyme A reductase
oppD_2	832847		972		A>G	L>L	0.148		1.82e-05		-0.952		Oligopeptide transport ATP-binding protein OppD
gsiC	617947		402		C>T	D>D	0.0166		1.96e-05		-7.69		Glutathione transport system permease protein GsiC
leuS	691154		516		T>C	L>L	0.0166		1.96e-05		-7.69		Leucine--tRNA ligase
punA	938167		46		A>G	T>A	0.0166		1.96e-05		-7.69		Purine nucleoside phosphorylase 1
punA	938182		61		A>G	T>A	0.0166		1.96e-05		-7.69		Purine nucleoside phosphorylase 1
rasP	967482		189		C>T	G>G	0.0166		1.96e-05		-7.69		Regulator of sigma-W protease RasP
tadA_1	1105102		384		T>C	H>H	0.0166		1.96e-05		-7.69		tRNA-specific adenosine deaminase
group_1491	365970		15		A>G	Q>Q	0.961		2.18e-05		4.74		Nucleoid-associated protein
group_1491	365973		18		C>T	N>N	0.961		2.18e-05		4.74		Nucleoid-associated protein
nrdE2	807258		224		A>G	H>R	0.964		2.25e-05		4.79		Ribonucleoside-diphosphate reductase subunit alpha 2
mtgA_1	763374		2013		T>C	Y>Y	0.0166		2.37e-05		-7.2		Biosynthetic peptidoglycan transglycosylase
focA	222396		390		T>C	G>G	0.0196		2.52e-05		-6.79		Putative formate transporter 1
group_1161	324150		663		T>C	D>D	0.0196		2.52e-05		-6.79		Putative response regulatory protein
ptsI	935940		837		A>G	T>T	0.0196		2.52e-05		-6.79		Phosphoenolpyruvate-protein phosphotransferase
fus	244194		1842		C>T	N>N	0.0166		2.59e-05		-9.14		Elongation factor G
fus	244350		1998		G>A	T>T	0.0166		2.59e-05		-9.14		Elongation factor G
group_539	564833		202		A>G	K>E	0.0166		2.59e-05		-9.14		Hypothetical protein
kdgR	667634		252		C>A	G>G	0.0166		2.59e-05		-9.14		HTH-type transcriptional regulator KdgR
pepX	867092		1218		T>C	T>T	0.0166		2.59e-05		-9.14		Xaa-Pro dipeptidyl-peptidase
comFA	126595		1062		T>C	I>I	0.0316		2.6e-05		3.26		ComF operon protein 1
group_1564	383256		1427		C>A	P>Q	0.0316		2.6e-05		3.26		Hypothetical protein
group_1094	315554		460		C>T	P>S	0.962		2.87e-05		5.36		Hypothetical protein
group_1008	294529		905		T>C	V>A	0.0166		2.88e-05		-9.16		Hypothetical protein
hmo	634889		324		A>G	K>K	0.0166		2.88e-05		-9.16		4-hydroxymandelate oxidase
ktrA	669746		573		T>C	T>T	0.0166		2.88e-05		-9.16		Ktr system potassium uptake protein A
ktrB	671229		1381		C>T	L>L	0.0166		2.88e-05		-9.16		Ktr system potassium uptake protein B
sstT	1100050		1212		A>C	A>A	0.0166		2.88e-05		-9.16		Serine/threonine transporter SstT
brnQ	86307		1044		C>T	G>G	0.964		3.08e-05		6.17		Branched-chain amino acid transport system 2 carrier protein
brnQ	86316		1053		C>T	V>V	0.964		3.08e-05		6.17		Branched-chain amino acid transport system 2 carrier protein
group_1055	301804		286		T>C	L>L	0.964		3.08e-05		6.17		Hypothetical protein
group_4461	502961		7		A>G	I>V	0.964		3.08e-05		6.17		Alpha-monoglucosyldiacylglycerol synthase
group_4504	511009		1011		T>C	A>A	0.964		3.08e-05		6.17		Hypothetical protein
group_4504	513478		3480		T>C	G>G	0.964		3.08e-05		6.17		Hypothetical protein
group_4652	541481		622		A>G	M>V	0.964		3.08e-05		6.17		Hypothetical protein
group_531	563878		813		C>T	Y>Y	0.964		3.08e-05		6.17		Hypothetical protein
group_531	563941		876		T>C	T>T	0.964		3.08e-05		6.17		Hypothetical protein
group_531	563942		877		G>A	D>N	0.964		3.08e-05		6.17		Hypothetical protein
group_531	563956		891		G>A	E>E	0.964		3.08e-05		6.17		Hypothetical protein
group_531	563959		894		T>C	G>G	0.964		3.08e-05		6.17		Hypothetical protein
pepQ	862385		231		C>T	D>D	0.964		3.08e-05		6.17		Xaa-Pro dipeptidase
pheT	883184		159		T>C	C>C	0.964		3.08e-05		6.17		Phenylalanine--tRNA ligase beta subunit
rexB	990675		1940		A>G	N>S	0.964		3.08e-05		6.17		ATP-dependent helicase/deoxyribonuclease subunit B
rexB	990683		1948		T>C	L>L	0.964		3.08e-05		6.17		ATP-dependent helicase/deoxyribonuclease subunit B
valS	1174398		1929		T>C	F>F	0.0151		3.3e-05		-7.91		Valine--tRNA ligase
group_2122	432510		87		G>A	K>K	0.0151		3.37e-05		-8.05		Hypothetical protein
group_372	448224		585		A>G	A>A	0.0151		3.37e-05		-8.05		Hypothetical protein
lepA	689429		624		G>T	V>V	0.0151		3.37e-05		-8.05		Elongation factor 4
lepA	689432		627		T>C	Y>Y	0.0151		3.37e-05		-8.05		Elongation factor 4
dacA_1	144038		338		A>G	N>S	0.962		3.4e-05		4.96		D-alanyl-D-alanine carboxypeptidase DacA
dppC	183086		676		T>C	L>L	0.0151		3.63e-05		-7.38		Dipeptide transport system permease protein DppC
dppC	183134		724		A>G	I>V	0.0151		3.63e-05		-7.38		Dipeptide transport system permease protein DppC
group_4423	494163		341		G>A	R>H	0.0151		3.63e-05		-7.38		Hypothetical protein
lacC_1	673880		753		A>G	S>S	0.0151		3.63e-05		-7.38		Tagatose-6-phosphate kinase
lacC_1	673883		756		G>T	G>G	0.0151		3.63e-05		-7.38		Tagatose-6-phosphate kinase
lacZ	683095		1211		A>G	N>S	0.0151		3.63e-05		-7.38		Beta-galactosidase
punA	938241		120		A>G	E>E	0.0151		3.63e-05		-7.38		Purine nucleoside phosphorylase 1
punA	938245		124		G>C	A>P	0.0151		3.63e-05		-7.38		Purine nucleoside phosphorylase 1
punA	938248		127		A>G	I>V	0.0151		3.63e-05		-7.38		Purine nucleoside phosphorylase 1
punA	938313		192		G>A	K>K	0.0151		3.63e-05		-7.38		Purine nucleoside phosphorylase 1
punA	938319		198		T>C	V>V	0.0151		3.63e-05		-7.38		Purine nucleoside phosphorylase 1
tmpC_1	1130746		174		A>G	L>L	0.0151		3.63e-05		-7.38		Membrane lipoprotein TmpC
tal_1	1110240		719		A>C	D>A	0.962		3.94e-05		4.97		Transaldolase
tal_1	1110244		723		T>A	N>K	0.962		3.94e-05		4.97		Transaldolase
addA	13710		3366		A>G	A>A	0.965		3.99e-05		4.93		ATP-dependent helicase/nuclease subunit A
eno	195790		777		C>T	Y>Y	0.965		3.99e-05		4.93		Annotation
eriC	197707		489		G>A	P>P	0.965		3.99e-05		4.93		Chloride/fluoride channel protein
nanA	797923		378		G>T	A>A	0.965		3.99e-05		4.93		N-acetylneuraminate lyase
nanA	797995		450		C>G	T>T	0.965		3.99e-05		4.93		N-acetylneuraminate lyase
pheT	884711		1686		A>T	V>V	0.965		3.99e-05		4.93		Phenylalanine--tRNA ligase beta subunit
pheT	884714		1689		T>C	A>A	0.965		3.99e-05		4.93		Phenylalanine--tRNA ligase beta subunit
glmS	265062		1524		A>G	L>L	0.0151		4.47e-05		-7.39		Glutamine--fructose-6-phosphate aminotransferase [isomerizing]
group_4710	557573		157		G>A	V>I	0.0151		4.47e-05		-7.39		Hypothetical protein
group_1310	328982		70		A>G	I>V	0.0166		4.49e-05		-8.98		Putative protein
group_1563	381493		1023		C>T	V>V	0.0166		4.49e-05		-8.98		Hypothetical protein
nrdE2	807282		248		A>C	D>A	0.0166		4.49e-05		-8.98		Ribonucleoside-diphosphate reductase subunit alpha 2
pnp	891830		483		T>C	I>I	0.0166		4.49e-05		-8.98		Polyribonucleotide nucleotidyltransferase
rhaR_1	993781		366		G>C	W>C	0.0166		4.49e-05		-8.98		HTH-type transcriptional activator RhaR
group_312	444560		209		G>A	G>D	0.0136		4.5e-05		-9.46		Hypothetical protein
atpC	66249		111		C>T	N>N	0.0181		4.93e-05		-7.13		ATP synthase epsilon chain
group_4625	535594		852		T>C	V>V	0.0181		4.93e-05		-7.13		Hypothetical protein
accD	5820		369		A>G	K>K	0.0181		4.99e-05		-7.27		Acetyl-coenzyme A carboxylase carboxyl transferase subunit beta
accD	5822		371		G>A	G>E	0.0181		4.99e-05		-7.27		Acetyl-coenzyme A carboxylase carboxyl transferase subunit beta
accD	5823		372		A>G	G>E	0.0181		4.99e-05		-7.27		Acetyl-coenzyme A carboxylase carboxyl transferase subunit beta
accD	5827		376		C>A	Q>K	0.0181		4.99e-05		-7.27		Acetyl-coenzyme A carboxylase carboxyl transferase subunit beta
accD	5829		378		A>G	Q>K	0.0181		4.99e-05		-7.27		Acetyl-coenzyme A carboxylase carboxyl transferase subunit beta
glpO	273935		646		T>C	L>L	0.0181		4.99e-05		-7.27		Alpha-glycerophosphate oxidase
metG	732941		1921		T>C	L>L	0.0181		4.99e-05		-7.27		Methionine--tRNA ligase
resA	987845		379		T>C	L>L	0.0181		4.99e-05		-7.27		Thiol-disulfide oxidoreductase ResA
scrB	1072690		1176		G>A	K>K	0.0181		4.99e-05		-7.27		Sucrose-6-phosphate hydrolase
yfmL	1203071		936		T>C	Y>Y	0.0181		4.99e-05		-7.27		Putative ATP-dependent RNA helicase YfmL
alaA	28365		735		C>T	G>G	0.965		5.14e-05		4.91		Glutamate-pyruvate aminotransferase AlaA
group_1563	381244		774		C>T	I>I	0.965		5.14e-05		4.91		Hypothetical protein
group_372	447669		30		C>G	G>G	0.965		5.14e-05		4.91		Hypothetical protein
group_4532	517978		378		A>G	G>G	0.965		5.14e-05		4.91		Hypothetical protein
gsiC	618073		528		G>C	G>G	0.965		5.14e-05		4.91		Glutathione transport system permease protein GsiC
dusB	186913		369		C>T	L>L	0.0392		5.44e-05		-1.69		tRNA-dihydrouridine synthase B
group_1418	348167		1482		T>A	A>A	0.0151		5.44e-05		-6.72		Hypothetical protein
hutH	646912		608		C>A	T>N	0.0392		5.44e-05		-1.69		Histidine ammonia-lyase
levE	693415		275		T>G	L>R	0.0151		5.44e-05		-6.72		PTS system fructose-specific EIIB component
licR_2	698866		513		C>T	D>D	0.0392		5.44e-05		-1.69		Putative licABCH operon regulator
mtgA_1	763437		2076		C>T	R>R	0.0151		5.44e-05		-6.72		Biosynthetic peptidoglycan transglycosylase
murJ	777303		1179		C>T	L>L	0.0151		5.44e-05		-6.72		Lipid II flippase MurJ
trmFO	1140432		1163		G>A	T>K	0.0151		5.44e-05		-6.72		Methylenetetrahydrofolate--tRNA-(uracil-5-)-methyltransferase TrmFO
msrAB	758861		48		G>T	L>F	0.958		5.57e-05		3.99		Peptide methionine sulfoxide reductase MsrA/MsrB
ecfA1	188034		65		C>T	T>I	0.012		5.73e-05		-3.6		Energy-coupling factor transporter ATP-binding protein EcfA1
hflX	632195		574		G>A	R>S	0.012		5.73e-05		-3.6		GTPase HflX
lepA	689612		807		C>T	A>A	0.965		5.78e-05		4.52		Elongation factor 4
pnp	891656		309		G>A	E>E	0.965		5.78e-05		4.52		Polyribonucleotide nucleotidyltransferase
rnz	1017802		410		T>A	V>E	0.965		5.78e-05		4.52		Ribonuclease Z
rnz	1017914		522		C>T	P>P	0.965		5.78e-05		4.52		Ribonuclease Z
brnQ	86577		1314		C>A	I>I	0.0136		5.83e-05		-8.27		Branched-chain amino acid transport system 2 carrier protein
group_4652	541247		388		A>G	M>V	0.0136		5.83e-05		-8.27		Hypothetical protein
group_531	563779		714		T>C	V>V	0.0136		5.83e-05		-8.27		Hypothetical protein
nrdF2_2	811054		900		A>T	V>V	0.0136		5.83e-05		-8.27		Ribonucleoside-diphosphate reductase subunit beta nrdF2
yusV	1231211		372		G>A	M>I	0.958		5.85e-05		3.93		Putative siderophore transport system ATP-binding protein YusV
queT	961147		82		T>C	L>L	0.958		5.89e-05		3.92		Queuosine precursor transporter QueT
group_1392	341736		211		A>G	I>V	0.0151		5.93e-05		-7.64		Hypothetical protein
licR_2	698983		630		C>T	L>L	0.0151		5.93e-05		-7.64		Putative licABCH operon regulator
manZ_1	720388		306		C>T	T>T	0.0151		5.93e-05		-7.64		PTS system mannose-specific EIID component
queG	959964		792		T>C	A>A	0.0151		5.93e-05		-7.64		Epoxyqueuosine reductase
rhaR_1	993884		469		T>C	L>L	0.0151		5.93e-05		-7.64		HTH-type transcriptional activator RhaR
rutB	1062786		346		A>C	R>R	0.0151		5.93e-05		-7.64		Peroxyureidoacrylate/ureidoacrylate amidohydrolase RutB
arsC	55074		375		G>T	M>I	0.0196		6.29e-05		-6.23		Arsenate reductase
bglK_2	83583		741		T>C	D>D	0.0196		6.29e-05		-6.23		Beta-glucoside kinase
gltX	275674		546		T>C	N>N	0.0196		6.29e-05		-6.23		Glutamate--tRNA ligase
gsiC	618166		621		T>C	T>T	0.0196		6.29e-05		-6.23		Glutathione transport system permease protein GsiC
gsiC	618418		873		A>C	L>L	0.0196		6.29e-05		-6.23		Glutathione transport system permease protein GsiC
murE	772227		828		T>C	A>A	0.0196		6.29e-05		-6.23		UDP-N-acetylmuramoyl-L-alanyl-D-glutamate--L-lysine ligase
recG	979711		1536		C>T	A>A	0.0196		6.29e-05		-6.23		ATP-dependent DNA helicase RecG
thyA	1124605		738		C>T	N>N	0.0196		6.29e-05		-6.23		Thymidylate synthase
dppC	182449		39		A>G	L>L	0.965		6.37e-05		4.27		Dipeptide transport system permease protein DppC
rplB	1021439		249		T>C	Y>Y	0.965		6.37e-05		4.27		50S ribosomal protein L2
group_4286	474154		318		A>G	G>G	0.0181		6.39e-05		-6.73		Hypothetical protein
group_4504	510642		644		G>A	G>E	0.0181		6.39e-05		-6.73		Hypothetical protein
nanA	798103		558		C>T	D>D	0.0181		6.39e-05		-6.73		N-acetylneuraminate lyase
rpsU	1050994		8		A>G	Q>R	0.735		6.53e-05		0.75		30S ribosomal protein S21
glnH	268592		461		C>T	A>V	0.958		6.73e-05		3.77		Glutamine-binding periplasmic protein
purR_2	947937		162		T>C	A>A	0.958		6.73e-05		3.77		Pur operon repressor
queG	959351		179		T>A	L>H	0.958		6.73e-05		3.77		Epoxyqueuosine reductase
queG	960244		1072		G>A	D>N	0.958		6.73e-05		3.77		Epoxyqueuosine reductase
group_738	599188		41		A>G	A>G	0.958		6.74e-05		3.87		Hypothetical protein
mutS2	786583		2080		T>C	K>Q	0.958		6.95e-05		3.81		Endonuclease MutS2
appA	37449		900		A>C	K>N	0.962		7.19e-05		4.54		Hypothetical protein
asnS	58378		76		G>A	A>T	0.962		7.19e-05		4.54		Asparagine--tRNA ligase
glpO	273303		14		G>A	R>K	0.962		7.19e-05		4.54		Alpha-glycerophosphate oxidase
glpO	273307		18		A>G	E>E	0.962		7.19e-05		4.54		Alpha-glycerophosphate oxidase
glpO	273526		237		G>A	V>V	0.0151		7.19e-05		-7.15		Alpha-glycerophosphate oxidase
group_4462	504760		471		T>C	G>G	0.962		7.19e-05		4.54		Hypothetical protein
kdgA	666172		429		A>G	I>M	0.962		7.19e-05		4.54		KHG/KDPG aldolase
murE	771564		165		G>A	G>G	0.962		7.19e-05		4.54		UDP-N-acetylmuramoyl-L-alanyl-D-glutamate--L-lysine ligase
murE	771888		489		G>A	E>E	0.962		7.19e-05		4.54		UDP-N-acetylmuramoyl-L-alanyl-D-glutamate--L-lysine ligase
prfC	912671		435		G>A	G>G	0.962		7.19e-05		4.54		Peptide chain release factor 3
proB	919811		600		T>C	V>V	0.962		7.19e-05		4.54		Glutamate 5-kinase 1
yhaM	1204790		897		G>T	I>I	0.962		7.19e-05		4.54		3'-5' exoribonuclease YhaM
cof	123232		375		C>T	V>V	0.962		7.53e-05		4.27		HMP-PP phosphatase
cof	123319		462		T>C	F>F	0.962		7.53e-05		4.27		HMP-PP phosphatase
exoA	200831		472		G>A	A>T	0.962		7.53e-05		4.27		Exodeoxyribonuclease
group_4293	476590		450		C>T	L>L	0.962		7.53e-05		4.27		Putative universal stress protein
metG	732268		1248		C>T	D>D	0.962		7.53e-05		4.27		Methionine--tRNA ligase
murJ	776907		783		C>T	A>A	0.962		7.53e-05		4.27		Lipid II flippase MurJ
pnp	892463		1116		C>T	A>A	0.962		7.53e-05		4.27		Polyribonucleotide nucleotidyltransferase
proA	918194		234		A>G	I>M	0.962		7.53e-05		4.27		Gamma-glutamyl phosphate reductase
pyrDA	952961		563		C>T	S>F	0.962		7.53e-05		4.27		Putative dihydroorotate dehydrogenase A (fumarate)
pyrDA	952968		570		T>G	V>V	0.962		7.53e-05		4.27		Putative dihydroorotate dehydrogenase A (fumarate)
rsmA	1055021		738		G>C	G>G	0.962		7.53e-05		4.27		Ribosomal RNA small subunit methyltransferase A
ennX_1	193953		242		A>-	K>-	0.0316		7.74e-05		-6.04		Virulence factor-related M protein
ennX_1	193954		243		A>-	K>-	0.0316		7.74e-05		-6.04		Virulence factor-related M protein
msrB	760127		207		C>T	P>P	0.0181		7.82e-05		-6.71		Peptide methionine sulfoxide reductase MsrB
mnmG	750545		711		G>T	E>D	0.0151		8.33e-05		-9.07		tRNA uridine 5-carboxymethylaminomethyl modification enzyme MnmG
resA	987730		264		A>G	E>E	0.0151		8.33e-05		-9.07		Thiol-disulfide oxidoreductase ResA
ptsI	936165		1062		T>C	N>N	0.0151		8.4e-05		-6.49		Phosphoenolpyruvate-protein phosphotransferase
ptsI	936174		1071		T>C	L>L	0.0151		8.4e-05		-6.49		Phosphoenolpyruvate-protein phosphotransferase
ptsI	936195		1092		T>C	I>I	0.0151		8.4e-05		-6.49		Phosphoenolpyruvate-protein phosphotransferase
ptsI	936252		1149		T>C	R>R	0.0151		8.4e-05		-6.49		Phosphoenolpyruvate-protein phosphotransferase
pheT	883145		120		T>A	D>E	0.0151		8.92e-05		-9.07		Phenylalanine--tRNA ligase beta subunit
pheT	883415		390		T>C	I>I	0.0151		8.92e-05		-9.07		Phenylalanine--tRNA ligase beta subunit
appA	37179		630		C>T	W>C	0.0151		8.95e-05		-8.96		Hypothetical protein
argS	46803		837		C>T	S>S	0.0151		8.95e-05		-8.96		Arginine--tRNA ligase
artQ_2	56695		73		A>G	I>V	0.0151		8.95e-05		-8.96		Arginine transport system permease protein ArtQ
bepA	75462		945		T>C	A>A	0.0151		8.95e-05		-8.96		Beta-barrel assembly-enhancing protease
coaE	121609		129		C>T	R>R	0.0151		8.95e-05		-8.96		Dephospho-CoA kinase
codY	122677		603		T>C	N>N	0.0151		8.95e-05		-8.96		GTP-sensing transcriptional pleiotropic repressor CodY
dexB	155251		576		G>T	R>R	0.0151		8.95e-05		-8.96		Glucan 1
dgkA	156595		306		T>C	A>A	0.0151		8.95e-05		-8.96		Undecaprenol kinase
dnaJ	176827		279		T>C	G>G	0.0151		8.95e-05		-8.96		Chaperone protein DnaJ
dnaJ	176839		291		T>C	G>G	0.0151		8.95e-05		-8.96		Chaperone protein DnaJ
dtd3	186068		316		C>T	H>Y	0.0151		8.95e-05		-8.96		D-aminoacyl-tRNA deacylase
fhs1	216625		405		T>C	T>T	0.0151		8.95e-05		-8.96		Formate--tetrahydrofolate ligase 1
gdpP	254490		1557		T>C	S>S	0.0151		8.95e-05		-8.96		Cyclic-di-AMP phosphodiesterase GdpP
glyA	277413		839		T>A	V>D	0.0151		8.95e-05		-8.96		Serine hydroxymethyltransferase
glyA	277423		849		C>T	F>F	0.0151		8.95e-05		-8.96		Serine hydroxymethyltransferase
glyA	277489		915		C>T	D>D	0.0151		8.95e-05		-8.96		Serine hydroxymethyltransferase
glyA	277495		921		T>C	F>F	0.0151		8.95e-05		-8.96		Serine hydroxymethyltransferase
glyA	277754		1180		A>G	N>D	0.0151		8.95e-05		-8.96		Serine hydroxymethyltransferase
glyA	277759		1185		G>A	Q>Q	0.0151		8.95e-05		-8.96		Serine hydroxymethyltransferase
glyA	277760		1186		A>G	T>A	0.0151		8.95e-05		-8.96		Serine hydroxymethyltransferase
glyA	277761		1187		C>A	T>N	0.0151		8.95e-05		-8.96		Serine hydroxymethyltransferase
glyA	277762		1188		T>A	T>T	0.0151		8.95e-05		-8.96		Serine hydroxymethyltransferase
glyA	277763		1189		G>A	V>I	0.0151		8.95e-05		-8.96		Serine hydroxymethyltransferase
glyA	277764		1190		T>C	V>A	0.0151		8.95e-05		-8.96		Serine hydroxymethyltransferase
glyA	277810		1236		T>C	A>A	0.0151		8.95e-05		-8.96		Serine hydroxymethyltransferase
gmuD_1	282387		952		A>G	N>D	0.0151		8.95e-05		-8.96		6-phospho-beta-glucosidase GmuD
group_1008	294482		858		G>A	G>G	0.0151		8.95e-05		-8.96		Hypothetical protein
group_1108	318325		13		G>T	D>Y	0.0151		8.95e-05		-8.96		Hypothetical protein
group_1400	343475		1071		G>T	L>L	0.0151		8.95e-05		-8.96		Hypothetical protein
group_1400	343685		1281		C>T	L>L	0.0151		8.95e-05		-8.96		Hypothetical protein
group_1526	371058		159		G>A	L>L	0.0151		8.95e-05		-8.96		Hypothetical protein
group_1526	371226		327		T>C	N>N	0.0151		8.95e-05		-8.96		Hypothetical protein
group_1537	372685		1093		C>T	M>L	0.0151		8.95e-05		-8.96		Hypothetical protein
group_276	442911		591		C>T	I>I	0.0151		8.95e-05		-8.96		Hypothetical protein
group_370	447545		122		A>C	Y>S	0.0151		8.95e-05		-8.96		Hypothetical protein
group_4263	470995		321		A>G	G>G	0.0151		8.95e-05		-8.96		GTP cyclohydrolase 1 type 2
group_4678	548221		396		C>T	A>A	0.0151		8.95e-05		-8.96		Hypothetical protein
group_4678	549460		1635		A>T	E>D	0.0151		8.95e-05		-8.96		Hypothetical protein
group_4678	549620		1795		G>A	A>T	0.0151		8.95e-05		-8.96		Hypothetical protein
group_4678	549622		1797		A>G	A>A	0.0151		8.95e-05		-8.96		Hypothetical protein
group_611	580713		319		A>C	I>L	0.0151		8.95e-05		-8.96		Putative ABC transporter ATP-binding protein
group_611	580927		533		A>G	D>G	0.0151		8.95e-05		-8.96		Putative ABC transporter ATP-binding protein
group_635	585938		2178		A>G	N>K	0.0151		8.95e-05		-8.96		Hypothetical protein
group_650	589020		79		T>G	Y>D	0.0151		8.95e-05		-8.96		NAD-dependent malic enzyme
group_825	603198		30		T>C	S>S	0.0151		8.95e-05		-8.96		Hypothetical protein
group_825	603760		592		A>G	V>V	0.0151		8.95e-05		-8.96		Hypothetical protein
hsdR	641237		1185		A>G	V>V	0.0151		8.95e-05		-8.96		Type-1 restriction enzyme R protein
hsdR	641277		1225		C>T	H>Y	0.0151		8.95e-05		-8.96		Type-1 restriction enzyme R protein
hsdR	641297		1245		A>T	R>R	0.0151		8.95e-05		-8.96		Type-1 restriction enzyme R protein
hsdR	641321		1269		A>C	T>T	0.0151		8.95e-05		-8.96		Type-1 restriction enzyme R protein
hsdR	641324		1272		T>C	G>G	0.0151		8.95e-05		-8.96		Type-1 restriction enzyme R protein
hsdR	641337		1285		A>G	M>V	0.0151		8.95e-05		-8.96		Type-1 restriction enzyme R protein
hsdR	641435		1383		C>T	H>H	0.0151		8.95e-05		-8.96		Type-1 restriction enzyme R protein
hsdR	641456		1404		C>T	F>F	0.0151		8.95e-05		-8.96		Type-1 restriction enzyme R protein
hsdR	641507		1455		T>G	P>P	0.0151		8.95e-05		-8.96		Type-1 restriction enzyme R protein
ileS	653610		409		A>G	N>D	0.0151		8.95e-05		-8.96		Isoleucine--tRNA ligase
menH	729456		753		T>C	H>H	0.0151		8.95e-05		-8.96		2-succinyl-6-hydroxy-2
mngB	746958		2329		C>A	Q>K	0.0151		8.95e-05		-8.96		Mannosylglycerate hydrolase
mngB	746963		2334		T>C	H>H	0.0151		8.95e-05		-8.96		Mannosylglycerate hydrolase
msmX	757733		564		G>A	T>T	0.0151		8.95e-05		-8.96		Oligosaccharides import ATP-binding protein MsmX
mutS2	786337		1834		G>A	D>N	0.0151		8.95e-05		-8.96		Endonuclease MutS2
mutS2	786403		1900		T>C	G>R	0.0151		8.95e-05		-8.96		Endonuclease MutS2
nagR_2	796243		642		C>A	N>K	0.0151		8.95e-05		-8.96		HTH-type transcriptional repressor NagR
opuCA	835664		597		T>C	A>A	0.0151		8.95e-05		-8.96		Carnitine transport ATP-binding protein OpuCA
opuCA	835685		618		G>A	V>V	0.0151		8.95e-05		-8.96		Carnitine transport ATP-binding protein OpuCA
pcp	845385		238		A>G	I>V	0.0151		8.95e-05		-8.96		Pyrrolidone-carboxylate peptidase
pepF1_1	855458		1344		C>T	T>T	0.0151		8.95e-05		-8.96		Oligoendopeptidase F
polC	896314		191		C>T	T>I	0.0151		8.95e-05		-8.96		DNA polymerase III PolC-type
polC	896315		192		G>A	T>I	0.0151		8.95e-05		-8.96		DNA polymerase III PolC-type
polC	896316		193		C>A	R>R	0.0151		8.95e-05		-8.96		DNA polymerase III PolC-type
polC	896918		795		T>C	I>I	0.0151		8.95e-05		-8.96		DNA polymerase III PolC-type
ppc	908798		2151		C>T	N>N	0.0151		8.95e-05		-8.96		Phosphoenolpyruvate carboxylase
prmA	916971		805		C>T	L>L	0.0151		8.95e-05		-8.96		Ribosomal protein L11 methyltransferase
purB	940231		7		T>G	S>A	0.0151		8.95e-05		-8.96		Adenylosuccinate lyase
purB	940232		8		C>A	S>*	0.0151		8.95e-05		-8.96		Adenylosuccinate lyase
purC	941744		227		C>T	A>V	0.0151		8.95e-05		-8.96		Phosphoribosylaminoimidazole-succinocarboxamide synthase
purC	942034		517		T>G	C>G	0.0151		8.95e-05		-8.96		Phosphoribosylaminoimidazole-succinocarboxamide synthase
purD	942501		249		A>C	F>F	0.0151		8.95e-05		-8.96		Phosphoribosylamine--glycine ligase
purK	946713		1038		A>G	L>L	0.0151		8.95e-05		-8.96		N5-carboxyaminoimidazole ribonucleotide synthase
purK	946714		1039		C>G	F>V	0.0151		8.95e-05		-8.96		N5-carboxyaminoimidazole ribonucleotide synthase
purK	946716		1041		A>G	F>L	0.0151		8.95e-05		-8.96		N5-carboxyaminoimidazole ribonucleotide synthase
rapA	963609		681		C>T	G>G	0.0151		8.95e-05		-8.96		RNA polymerase-associated protein RapA
rapA	963610		682		G>A	V>I	0.0151		8.95e-05		-8.96		RNA polymerase-associated protein RapA
rapA	963636		708		T>C	D>D	0.0151		8.95e-05		-8.96		RNA polymerase-associated protein RapA
rapA	964761		1833		T>C	D>D	0.0151		8.95e-05		-8.96		RNA polymerase-associated protein RapA
recD2	975261		669		T>C	H>H	0.0151		8.95e-05		-8.96		ATP-dependent RecD-like DNA helicase
rluD_1	1003196		102		T>C	G>G	0.0151		8.95e-05		-8.96		Ribosomal large subunit pseudouridine synthase D
rluD_1	1003790		696		G>A	R>R	0.0151		8.95e-05		-8.96		Ribosomal large subunit pseudouridine synthase D
rluD_1	1003874		780		C>T	A>A	0.0151		8.95e-05		-8.96		Ribosomal large subunit pseudouridine synthase D
rnhB	1007894		414		G>T	L>L	0.0151		8.95e-05		-8.96		Ribonuclease HII
rpoB	1036022		2223		G>A	G>G	0.0151		8.95e-05		-8.96		DNA-directed RNA polymerase subunit beta
rpoB	1036049		2250		C>T	A>A	0.0151		8.95e-05		-8.96		DNA-directed RNA polymerase subunit beta
rpoC	1039214		1848		C>T	F>F	0.0151		8.95e-05		-8.96		DNA-directed RNA polymerase subunit beta'
rsmE	1057275		220		G>A	E>K	0.0151		8.95e-05		-8.96		Ribosomal RNA small subunit methyltransferase E
rsmE	1057283		228		C>T	T>T	0.0151		8.95e-05		-8.96		Ribosomal RNA small subunit methyltransferase E
tig	1125614		883		C>T	L>L	0.0151		8.95e-05		-8.96		Hypothetical protein
tig	1125691		960		G>A	E>E	0.0151		8.95e-05		-8.96		Hypothetical protein
tig	1125784		1053		T>A	S>S	0.0151		8.95e-05		-8.96		Hypothetical protein
tkt	1127736		1721		A>G	D>G	0.0151		8.95e-05		-8.96		Transketolase
treA	1136732		1174		A>G	K>E	0.0151		8.95e-05		-8.96		Trehalose-6-phosphate hydrolase
typA	1151592		519		C>A	G>G	0.0151		8.95e-05		-8.96		GTP-binding protein TypA/BipA
typA	1151613		540		T>C	D>D	0.0151		8.95e-05		-8.96		GTP-binding protein TypA/BipA
typA	1151643		570		T>G	P>P	0.0151		8.95e-05		-8.96		GTP-binding protein TypA/BipA
ugl	1155840		261		A>G	G>G	0.0151		8.95e-05		-8.96		Unsaturated chondroitin disaccharide hydrolase
ugl	1155981		402		T>A	T>T	0.0151		8.95e-05		-8.96		Unsaturated chondroitin disaccharide hydrolase
ugl	1155982		403		T>C	S>P	0.0151		8.95e-05		-8.96		Unsaturated chondroitin disaccharide hydrolase
ulaA_1	1157808		1029		T>C	V>V	0.0151		8.95e-05		-8.96		Ascorbate-specific PTS system EIIC component
uvrA	1166394		543		T>C	D>D	0.0151		8.95e-05		-8.96		UvrABC system protein A
valS	1174512		2043		A>G	K>K	0.0151		8.95e-05		-8.96		Valine--tRNA ligase
valS	1174518		2049		G>A	L>L	0.0151		8.95e-05		-8.96		Valine--tRNA ligase
valS	1174551		2082		C>A	T>T	0.0151		8.95e-05		-8.96		Valine--tRNA ligase
valS	1174560		2091		C>T	I>I	0.0151		8.95e-05		-8.96		Valine--tRNA ligase
valS	1174563		2094		T>C	Y>Y	0.0151		8.95e-05		-8.96		Valine--tRNA ligase
valS	1174566		2097		C>T	A>A	0.0151		8.95e-05		-8.96		Valine--tRNA ligase
ypdF	1224641		828		T>C	L>L	0.0151		8.95e-05		-8.96		Aminopeptidase YpdF
accD	5835		384		T>A	A>A	0.962		9.02e-05		4.31		Acetyl-coenzyme A carboxylase carboxyl transferase subunit beta
accD	5964		513		C>T	G>G	0.962		9.02e-05		4.31		Acetyl-coenzyme A carboxylase carboxyl transferase subunit beta
dut	187636		114		A>G	V>V	0.962		9.02e-05		4.31		Deoxyuridine 5'-triphosphate nucleotidohydrolase
group_4445	501253		255		G>A	E>E	0.962		9.02e-05		4.31		Putative protein
group_4533	519406		1251		T>C	V>V	0.962		9.02e-05		4.31		Hypothetical protein
lepA	689408		603		G>A	Q>Q	0.962		9.02e-05		4.31		Elongation factor 4
lepA	689474		669		C>T	N>N	0.962		9.02e-05		4.31		Elongation factor 4
levE	693415		275		T>A	L>H	0.962		9.02e-05		4.31		PTS system fructose-specific EIIB component
ppaC	906359		648		G>A	V>V	0.962		9.02e-05		4.31		Putative manganese-dependent inorganic pyrophosphatase
radA	961857		291		A>G	P>P	0.962		9.02e-05		4.31		DNA repair protein RadA
scrB	1072609		1095		A>G	E>E	0.962		9.02e-05		4.31		Sucrose-6-phosphate hydrolase
yknX_1	1216143		1129		G>A	A>T	0.962		9.02e-05		4.31		Putative efflux system component YknX
atpD	67519		964		T>C	L>L	0.0136		9.36e-05		-6.94		ATP synthase subunit beta
group_2122	433035		612		T>G	G>G	0.0136		9.36e-05		-6.94		Hypothetical protein
lacF_2	678538		569		T>C	V>A	0.0136		9.36e-05		-6.94		Lactose transport system permease protein LacF
lacF_2	678608		639		C>T	N>N	0.0136		9.36e-05		-6.94		Lactose transport system permease protein LacF
lacF_2	678615		646		G>A	V>M	0.0136		9.36e-05		-6.94		Lactose transport system permease protein LacF
lacF_2	678617		648		A>G	V>M	0.0136		9.36e-05		-6.94		Lactose transport system permease protein LacF
thrS	1123777		1854		C>T	S>S	0.0136		9.36e-05		-6.94		Threonine--tRNA ligase
atpD	66987		432		T>G	P>P	0.0136		9.97e-05		-7.86		ATP synthase subunit beta
atpD	67017		462		C>T	F>F	0.0136		9.97e-05		-7.86		ATP synthase subunit beta
glpK	273124		1363		T>C	W>R	0.962		0.000102		4.33		Glycerol kinase

## Sheet: Table S7
Table S7. Pan-GWAS on genes for the Japanese cohort.
Genes	Allele frequency		p-value		Effect size		Function
group_184	0.881		1.79e-06		2.19		Hypothetical protein
divIC	0.961		6.72e-06		-4.33		Putative cell division protein

## Sheet: Table S8
Table S8. Pan-GWAS on genes for the global cohort.
Genes	Allele frequency		p-value		Effect size		Function
group_829	0.408		5.43e-39		2.67		IS30 family transposase ISStin2
group_141	0.471		2.8e-31		-2.22		Hypothetical protein
group_468	0.553		5.07e-22		1.77		Hypothetical protein
group_467	0.392		6e-21		-1.76		Hypothetical protein
group_139	0.366		2.67e-19		-1.7		Hypothetical protein
group_2718	0.0587		8.78e-15		-4.59		Hypothetical protein
group_2687	0.0602		1.41e-14		-4.57		Hypothetical protein
group_2464	0.0663		2.19e-14		-4.49		Hypothetical protein
group_2689	0.0617		6.99e-14		-4.43		Multidrug efflux system permease protein
group_771	0.136		1.19e-13		-3.64		Hypothetical protein
rhaR_3	0.0617		1.47e-13		-4.17		HTH-type transcriptional activator RhaR
group_1833	0.0633		2.03e-13		-4.39		Hypothetical protein
group_2688	0.0633		2.03e-13		-4.39		Multidrug efflux system ATP-binding protein
group_75	0.821		3.13e-13		1.93		Hypothetical protein
group_2692	0.0648		5.98e-13		-4.12		Hypothetical protein
group_1660	0.127		8.04e-13		-3.63		Hypothetical protein
group_1830	0.0633		8.51e-13		-4.06		Hypothetical protein
group_2696	0.0648		9.16e-13		-4.1		Hypothetical protein
group_1829	0.0663		2.32e-12		-3.98		Vitamin B12 import ATP-binding protein BtuD
ykoD_2	0.0663		2.32e-12		-3.98		Putative HMP/thiamine import ATP-binding protein YkoD
group_1247	0.0648		2.41e-12		-4.01		Hypothetical protein
group_1726	0.0151		3.11e-12		-13.8		Hypothetical protein
group_1191	0.136		4.16e-12		-3.23		Hypothetical protein
group_1831	0.0678		6.04e-12		-3.95		Hypothetical protein
irtA	0.0678		6.04e-12		-3.95		Putative multidrug export ATP-binding/permease protein
group_360	0.0693		6.74e-12		-3.96		Hypothetical protein
group_481	0.0693		8.25e-12		-3.91		Hypothetical protein
group_283	0.0602		9.38e-12		-3.79		Hypothetical protein
group_480	0.0693		2.14e-11		-3.82		Hypothetical protein
mepA	0.0693		2.91e-11		-3.76		Multidrug export protein MepA
group_633	0.0708		2.94e-11		-3.81		Hypothetical protein
group_634	0.0708		2.94e-11		-3.81		Hypothetical protein
group_872	0.0708		2.94e-11		-3.81		Hypothetical protein
group_1142	0.127		4.83e-11		-2.26		Polyisoprenyl-teichoic acid--peptidoglycan teichoic acid transferase TagU
tagU_1	0.873		6.76e-11		2.24		Polyisoprenyl-teichoic acid--peptidoglycan teichoic acid transferase TagU
group_2691	0.0723		6.85e-11		-3.79		Hypothetical protein
group_2613	0.155		2.35e-10		-3.44		Hypothetical protein
group_2000	0.16		2.61e-10		-3.37		Hypothetical protein
ermA1	0.0693		2.97e-10		-3.53		rRNA adenine N-6-methyltransferase
group_871	0.0693		2.97e-10		-3.53		Hypothetical protein
group_286	0.0723		3.99e-10		-3.52		Hypothetical protein
group_2612	0.157		5.07e-10		-3.39		Hypothetical protein
group_263	0.0723		5.23e-10		-3.52		Hypothetical protein
group_844	0.158		5.45e-10		-3.34		Hypothetical protein
group_1236	0.146		5.5e-10		-3.34		Hypothetical protein
group_2630	0.148		6.51e-10		-3.37		Hypothetical protein
group_1805	0.148		6.93e-10		-3.36		Hypothetical protein
group_2690	0.0708		6.95e-10		-3.49		Hypothetical protein
group_2617	0.148		8.59e-10		-3.34		Hypothetical protein
group_868	0.148		8.77e-10		-3.34		Hypothetical protein
dnaC_2	0.155		9.53e-10		-3.35		Replicative DNA helicase
group_1130	0.155		9.53e-10		-3.35		Hypothetical protein
xerC_2	0.152		1.04e-09		-3.38		Tyrosine recombinase XerC
group_145	0.0738		1.38e-09		-3.34		Hypothetical protein
clpP_1	0.151		1.69e-09		-3.35		ATP-dependent Clp protease proteolytic subunit
group_1651	0.152		1.69e-09		-3.35		Hypothetical protein
group_1741	0.151		1.69e-09		-3.35		Hypothetical protein
group_1804	0.151		1.69e-09		-3.35		Hypothetical protein
group_1806	0.151		1.69e-09		-3.35		Hypothetical protein
group_1807	0.151		1.69e-09		-3.35		Hypothetical protein
group_1808	0.151		1.69e-09		-3.35		Hypothetical protein
group_2608	0.151		1.69e-09		-3.35		Hypothetical protein
group_2614	0.151		1.69e-09		-3.35		Hypothetical protein
group_2615	0.151		1.69e-09		-3.35		Hypothetical protein
group_2616	0.151		1.69e-09		-3.35		Hypothetical protein
group_2618	0.151		1.69e-09		-3.35		Hypothetical protein
group_2619	0.151		1.69e-09		-3.35		Hypothetical protein
group_2620	0.151		1.69e-09		-3.35		Hypothetical protein
group_2622	0.151		1.69e-09		-3.35		Hypothetical protein
group_2623	0.151		1.69e-09		-3.35		Hypothetical protein
group_2624	0.151		1.69e-09		-3.35		Hypothetical protein
group_2625	0.151		1.69e-09		-3.35		Hypothetical protein
group_2632	0.151		1.69e-09		-3.35		Hypothetical protein
group_2633	0.151		1.69e-09		-3.35		Hypothetical protein
group_2634	0.151		1.69e-09		-3.35		Hypothetical protein
group_2635	0.151		1.69e-09		-3.35		Hypothetical protein
group_2636	0.151		1.69e-09		-3.35		Hypothetical protein
group_2637	0.151		1.69e-09		-3.35		Hypothetical protein
group_2638	0.151		1.69e-09		-3.35		Hypothetical protein
group_2639	0.151		1.69e-09		-3.35		Hypothetical protein
group_2640	0.151		1.69e-09		-3.35		Hypothetical protein
group_2641	0.151		1.69e-09		-3.35		Hypothetical protein
group_2642	0.151		1.69e-09		-3.35		Hypothetical protein
group_2643	0.151		1.69e-09		-3.35		Hypothetical protein
group_2645	0.151		1.69e-09		-3.35		Hypothetical protein
group_2646	0.151		1.69e-09		-3.35		Hypothetical protein
xerC_1	0.151		1.69e-09		-3.35		Tyrosine recombinase XerC
group_282	0.0753		2.05e-09		-3.36		Hypothetical protein
group_841	0.854		2.69e-09		1.57		Hypothetical protein
group_81	0.0693		3.19e-09		-2.67		Hypothetical protein
group_1276	0.0753		3.33e-09		-3.37		Hypothetical protein
hhaIM	0.0753		3.33e-09		-3.37		Modification methylase HhaI
group_1810	0.143		5.8e-09		-3		Hypothetical protein
group_870	0.0768		6.07e-09		-3.26		Hypothetical protein
dnaA_2	0.0768		8.09e-09		-3.2		Chromosomal replication initiator protein DnaA
group_109	0.0768		8.09e-09		-3.2		Hypothetical protein
group_1248	0.0768		8.09e-09		-3.2		Hypothetical protein
group_1826	0.0768		8.09e-09		-3.2		Hypothetical protein
group_630	0.0768		8.09e-09		-3.2		Hypothetical protein
group_594	0.0377		1.01e-08		-9.72		L-arabinose transport system permease protein AraQ
group_2611	0.148		1.02e-08		-3.1		Hypothetical protein
group_2629	0.146		1.35e-08		-2.99		Hypothetical protein
smc_3	0.0783		1.46e-08		-3.12		Chromosome partition protein Smc
group_162	0.0783		1.66e-08		-3.18		Hypothetical protein
group_181	0.0783		1.66e-08		-3.18		Hypothetical protein
group_1825	0.0783		1.66e-08		-3.18		Hypothetical protein
group_262	0.0783		1.66e-08		-3.18		Hypothetical protein
topB	0.0783		1.66e-08		-3.18		DNA topoisomerase 3
group_2628	0.148		2.13e-08		-2.98		Hypothetical protein
group_261	0.0738		2.29e-08		-3.06		Hypothetical protein
group_2631	0.149		2.34e-08		-3.02		Hypothetical protein
group_580	0.0316		2.73e-08		-8.37		Hypothetical protein
group_3	0.0633		8.01e-08		-2.54		Hypothetical protein
group_1809	0.143		8.34e-08		-2.72		Hypothetical protein
group_2266	0.86		8.89e-08		1.49		Hypothetical protein
group_2627	0.143		1.03e-07		-2.69		Hypothetical protein
group_278	0.0346		1.16e-07		-8.45		Hypothetical protein
group_414	0.0346		1.16e-07		-8.45		Hypothetical protein
group_80	0.758		1.2e-07		1.13		Hypothetical protein
group_1023	0.0331		1.98e-07		-8.1		Hypothetical protein
group_1811	0.148		3.7e-07		-2.66		Hypothetical protein
group_2644	0.148		3.7e-07		-2.66		Hypothetical protein
group_1182	0.0136		3.77e-07		-10.6		Hypothetical protein
group_615	0.901		5.02e-07		1.63		Hypothetical protein
group_1181	0.866		5.79e-07		1.42		Hypothetical protein
group_2286	0.866		5.79e-07		1.42		IS1182 family transposase ISStin8
group_2287	0.866		5.79e-07		1.42		Hypothetical protein
group_627	0.206		8.96e-07		-1.69		Hypothetical protein
group_1374	0.114		1.4e-06		-1.87		Hypothetical protein
group_1721	0.0392		1.48e-06		-2.63		Hypothetical protein
group_2035	0.0467		2.15e-06		-3.06		Hypothetical protein
group_2036	0.0467		2.15e-06		-3.06		Hypothetical protein
group_2315	0.0211		2.39e-06		-10.9		Hypothetical protein
group_1379	0.0377		2.95e-06		-3.96		Hypothetical protein
group_1803	0.215		3.42e-06		-1.57		Hypothetical protein
group_2610	0.203		3.66e-06		-1.72		Hypothetical protein
group_392	0.952		3.79e-06		1.86		Cell wall protein
group_824	0.0934		4.18e-06		-1.93		Hypothetical protein
group_2609	0.212		5.83e-06		-1.59		Hypothetical protein
group_558	0.0286		7.6e-06		-11.6		Hypothetical protein
araQ_2	0.962		1.31e-05		6.11		L-arabinose transport system permease protein AraQ
group_807	0.962		1.31e-05		6.11		Hypothetical protein
group_1003	0.0271		1.34e-05		-12.7		Streptokinase C
btuD_4	0.657		1.41e-05		0.779		Hypothetical protein
arnC	0.0557		1.85e-05		-2.86		Undecaprenyl-phosphate 4-deoxy-4-formamido-L-arabinose transferase
gtaB_1	0.0557		1.85e-05		-2.86		UTP--glucose-1-phosphate uridylyltransferase
group_2310	0.0226		2.11e-05		-3.24		Hypothetical protein
group_2324	0.0241		2.11e-05		-3.04		Hypothetical protein
cimH	0.0316		2.32e-05		-10.1		Citrate/malate transporter
group_440	0.0316		2.32e-05		-10.1		Hypothetical protein
hisZ	0.0316		2.32e-05		-10.1		Hypothetical protein
lafA	0.0316		2.32e-05		-10.1		Bacteriocin lactacin-F subunit LafA
group_1722	0.0196		2.41e-05		-11.4		Hypothetical protein
group_9	0.0542		2.45e-05		-1.94		Hypothetical protein
group_351	0.0105		2.9e-05		-11.8		Hypothetical protein
group_1703	0.0331		3.13e-05		-2.38		Hypothetical protein
group_1754	0.0346		3.58e-05		-2.31		Hypothetical protein
group_1140	0.0256		4.11e-05		-12.6		Hypothetical protein
group_980	0.0241		4.49e-05		-12		Hypothetical protein
group_525	0.875		4.85e-05		1.11		Hypothetical protein
group_432	0.887		5.17e-05		1.06		Glycine cleavage system H-like protein
group_3049	0.0196		5.44e-05		-3.01		Hypothetical protein
group_458	0.0286		5.9e-05		-2.47		Hypothetical protein
group_1459	0.0286		6.29e-05		-9.37		IS3 family transposase ISSag5
group_419	0.0286		6.29e-05		-9.37		Hypothetical protein
group_1509	0.0301		7.21e-05		-10		Hypothetical protein
hasB	0.0572		7.36e-05		-2.51		UDP-glucose 6-dehydrogenase
group_65	0.0361		7.44e-05		-2.11		Hypothetical protein
group_670	0.0557		7.5e-05		-2.16		Hypothetical protein

## Sheet: Table S9
Table S9. Complexes including k-mers significantly related to severe invasiveness detected in the Japanese cohort.
Complexes	p-value		q-value		Genes in complexes
Comp_11	4.41e-05		0.0149		covS
Comp_2	3.91e-05		0.0422		group_184, group_185, group_186, group_1278, group1443, group_1519, group_1520, group_2169

## Sheet: Table S10
Table S10. Complexes including k-mers significantly related to invasiveness detected in the global cohort.
Complexes	p-value		q-value		Genes in complexes
Comp_7	2.35e-06		0.019		group_130, covS
Comp_6	1.05e-05		0.019		(intergenic region)
Comp_24	1.96e-06		0.019		group_141, group_142, group_142
Comp_10	2.2e-05		0.024		sagG, sagI
Comp_15	2.05e-05		0.024		fhuB, fhuD

[truncated: 6 more sheets: Table S11, Table S12, Table S13, Table S14, Table S15, Table S16]
